# Supplementary material for: An exploration of potent antileishmanial agents derived from quinoline–thiazole and thiadiazole hybrids, targeting DHFR-TS and PTR1: design, synthesis, and computational analyses
Source: Royal Society of Chemistry journal article supplement (doi:10.1039/d5md00709g), 2025-11-19
Supplement: d5md00709g1.pdf [file d5md00709g1.pdf]

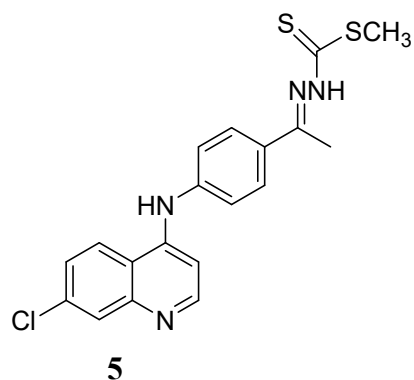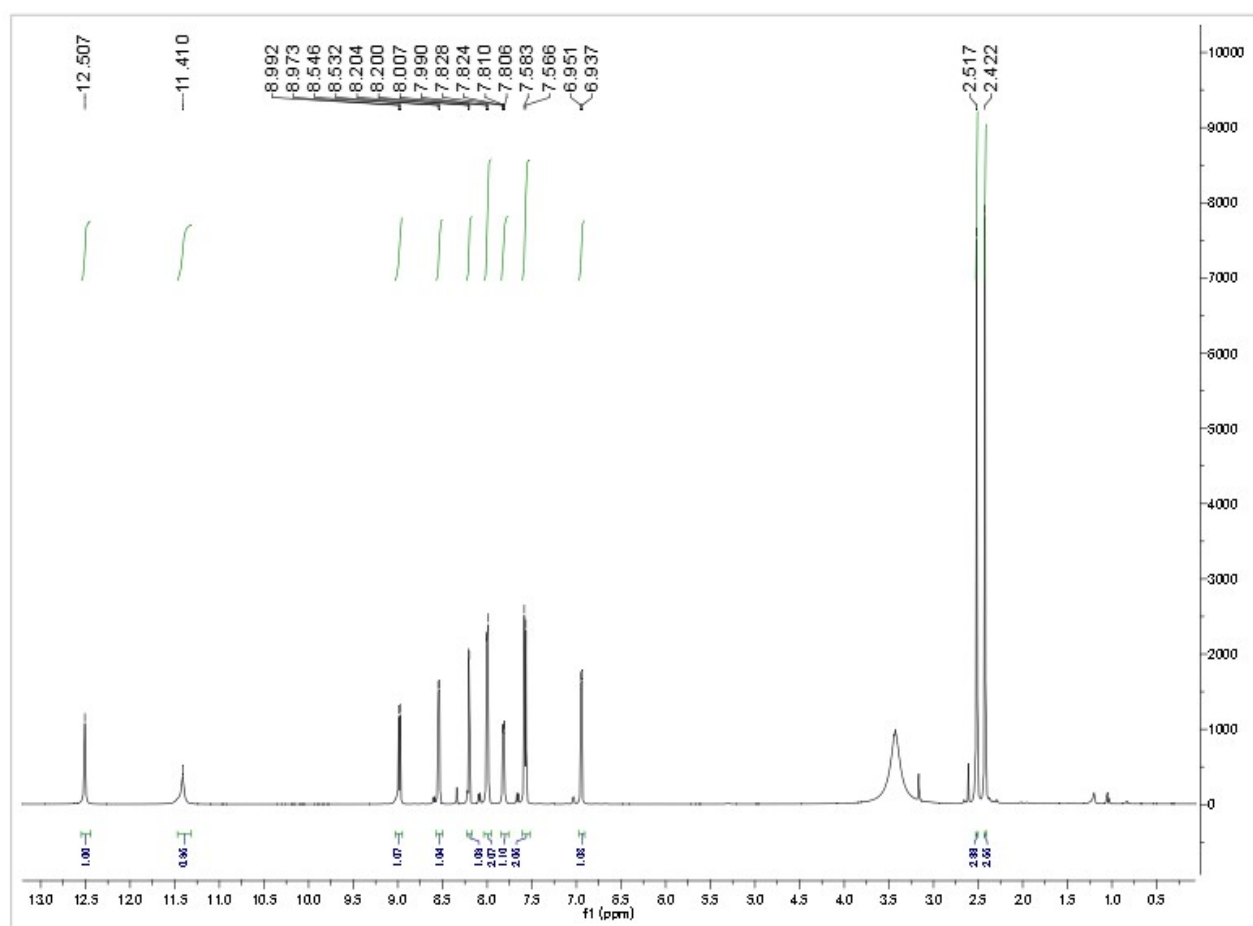

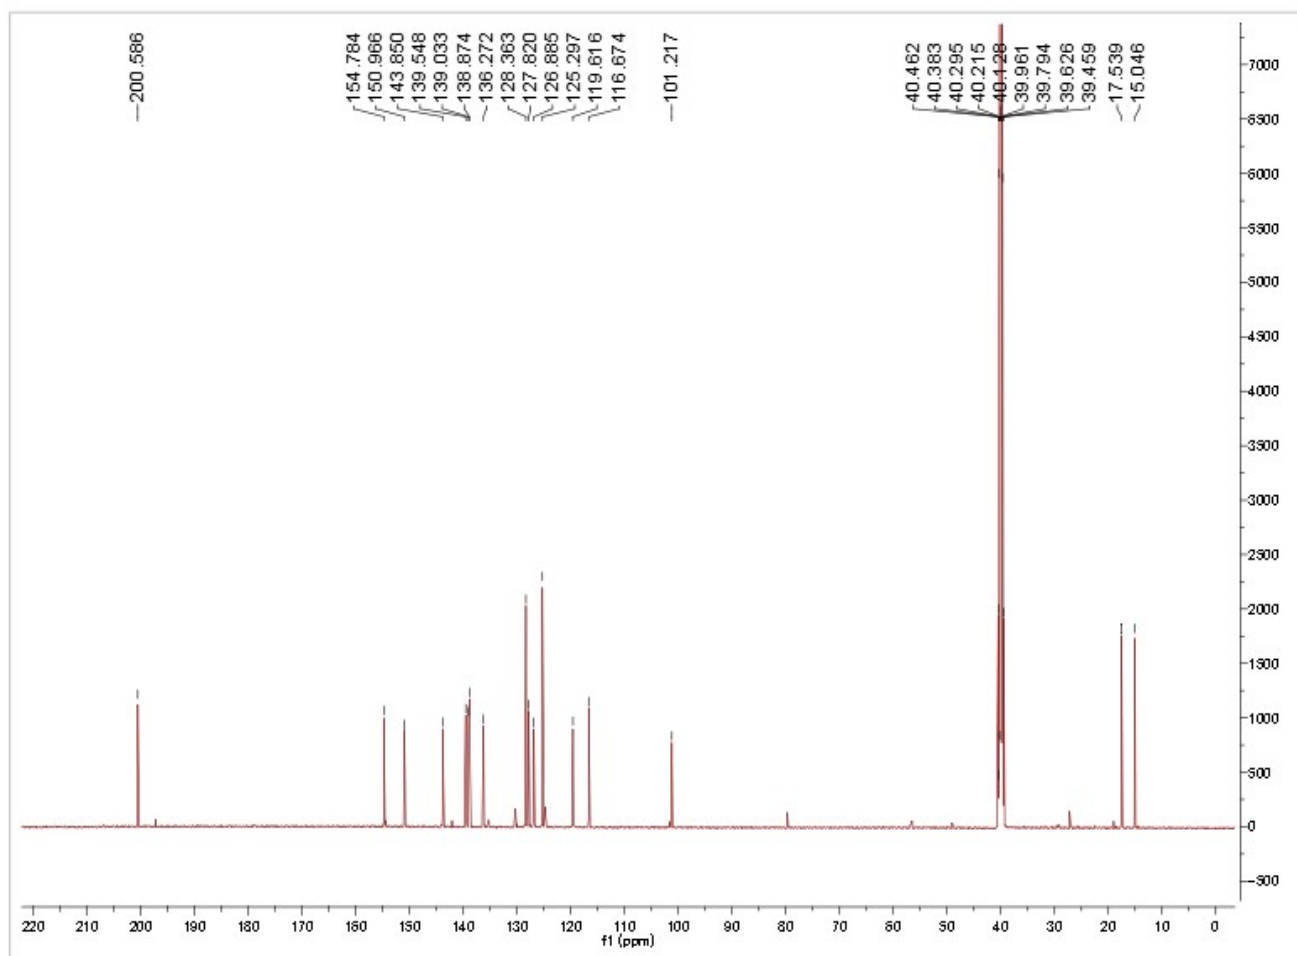

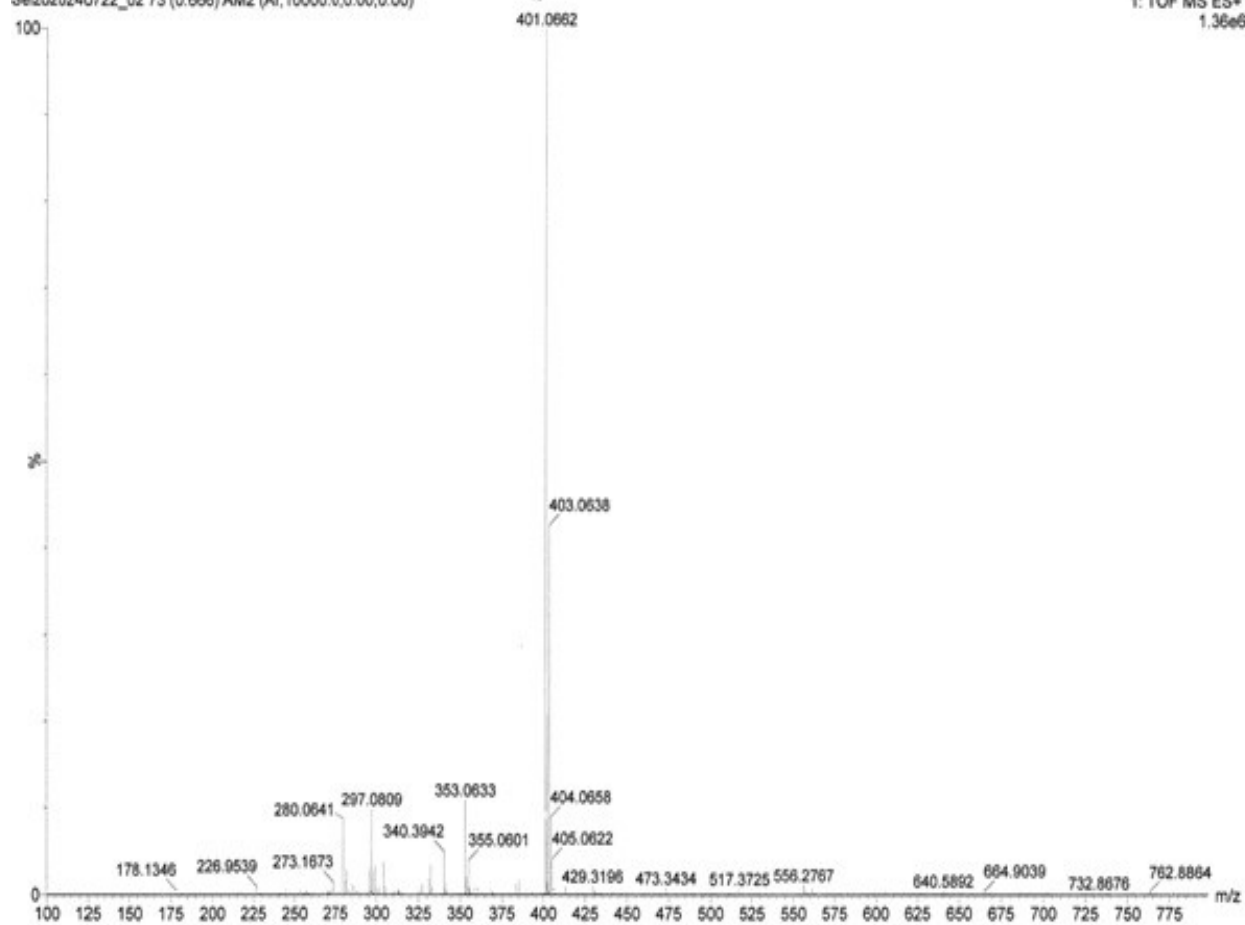

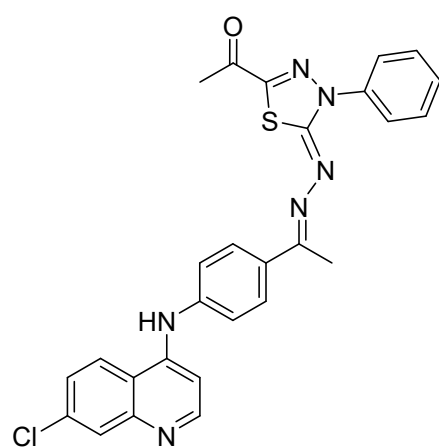

8a

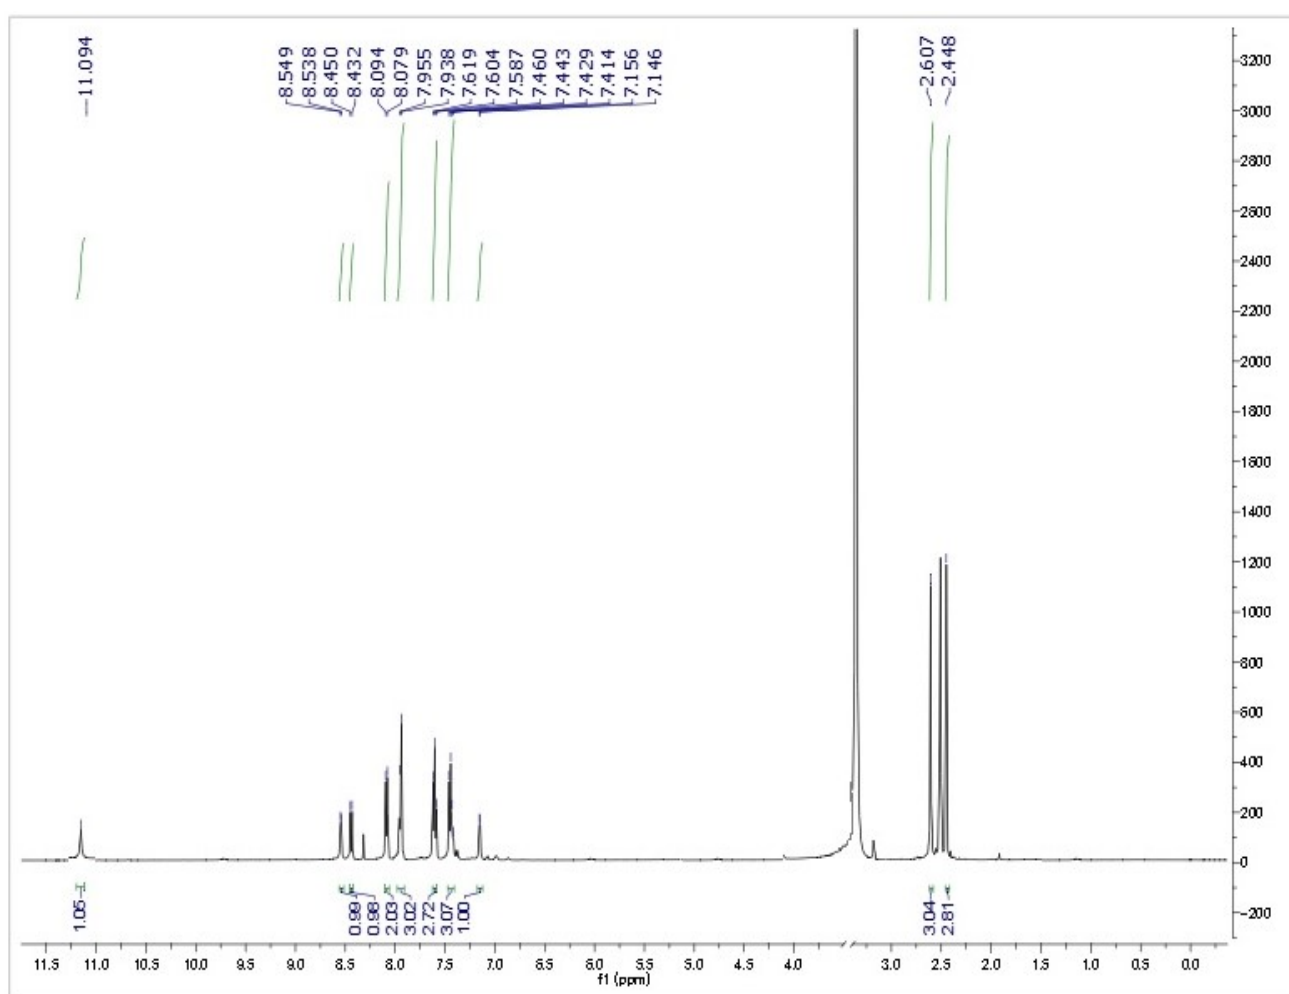

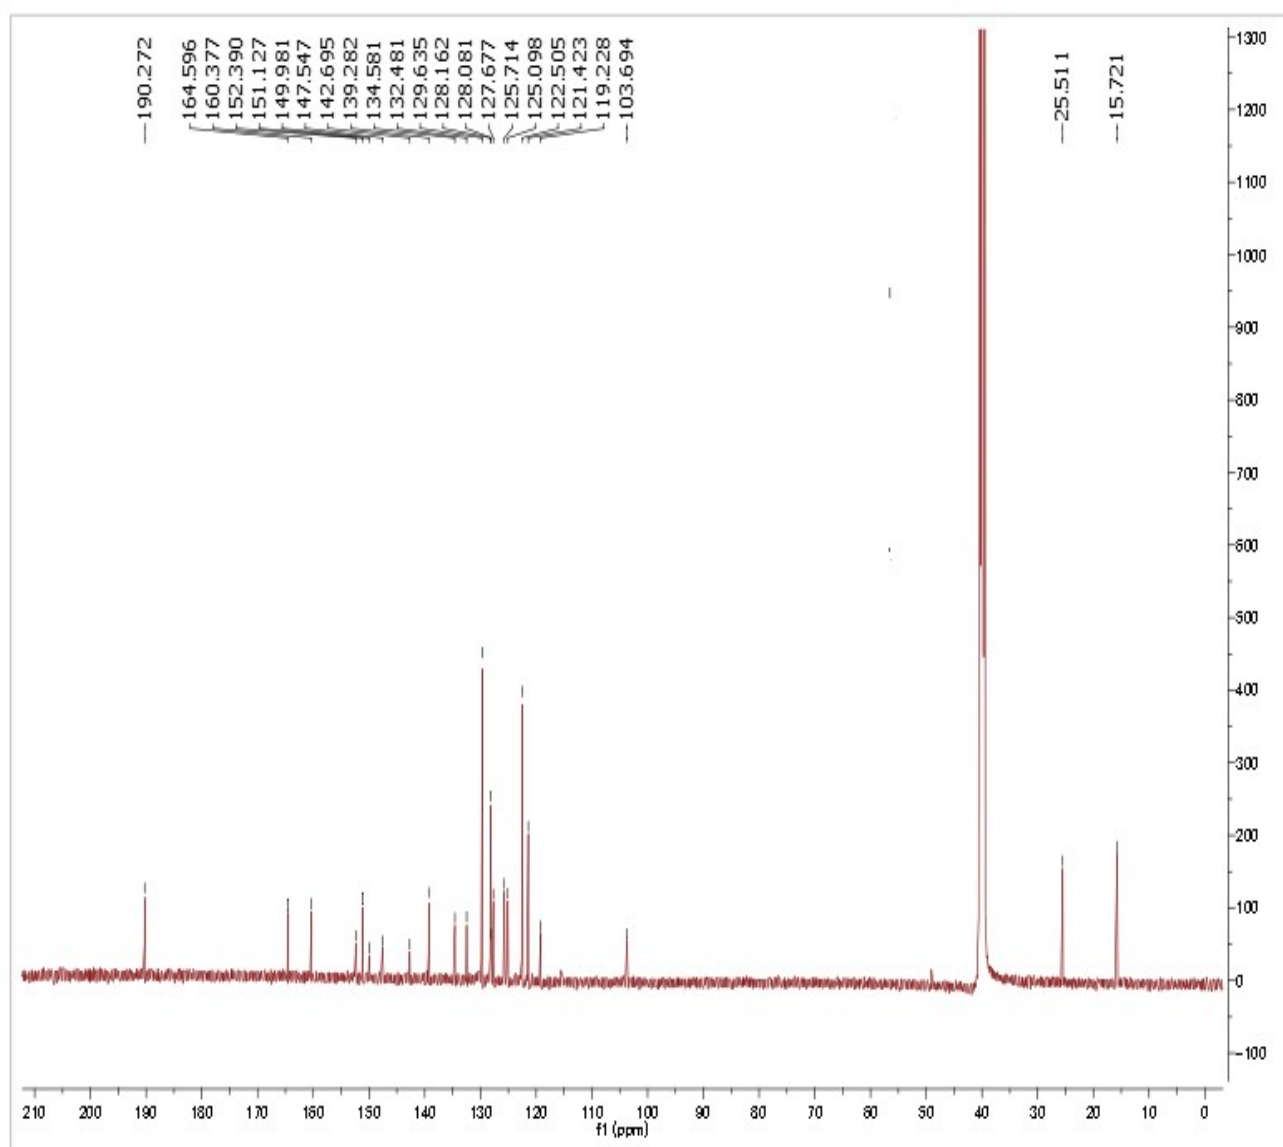

Seizo20240722\_03 74 (0.674) AM2 (Ar,10000.0,0.00,0.00)

1: TOF MS ES+  
7.11e5

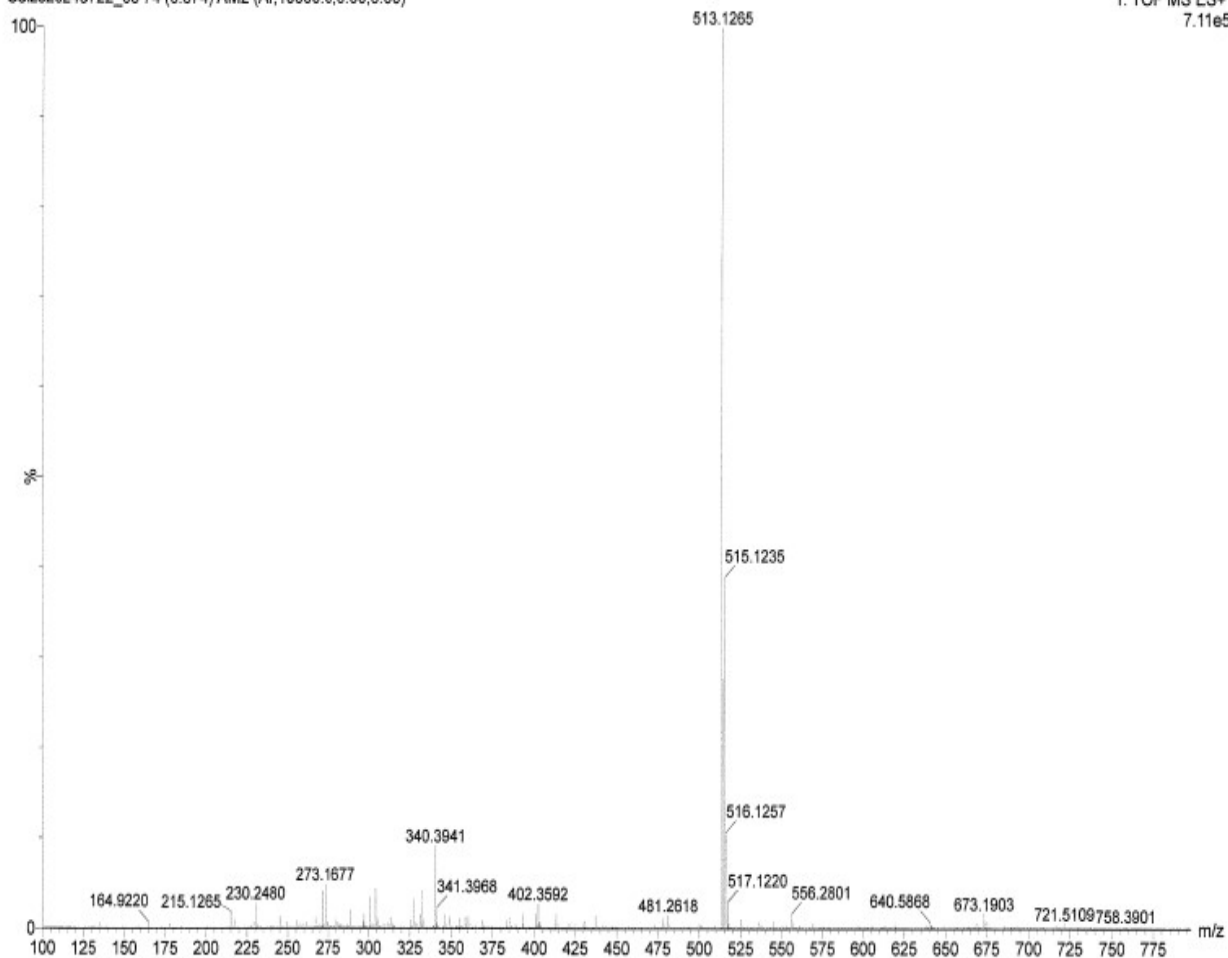

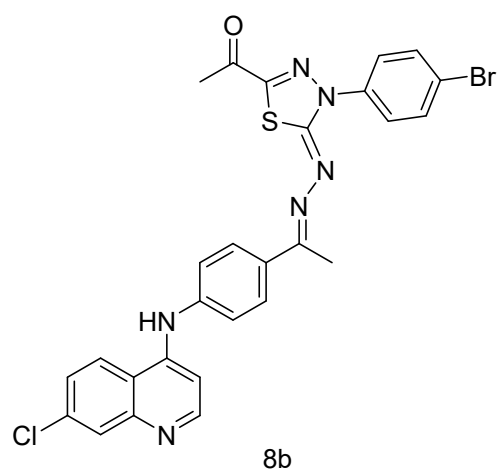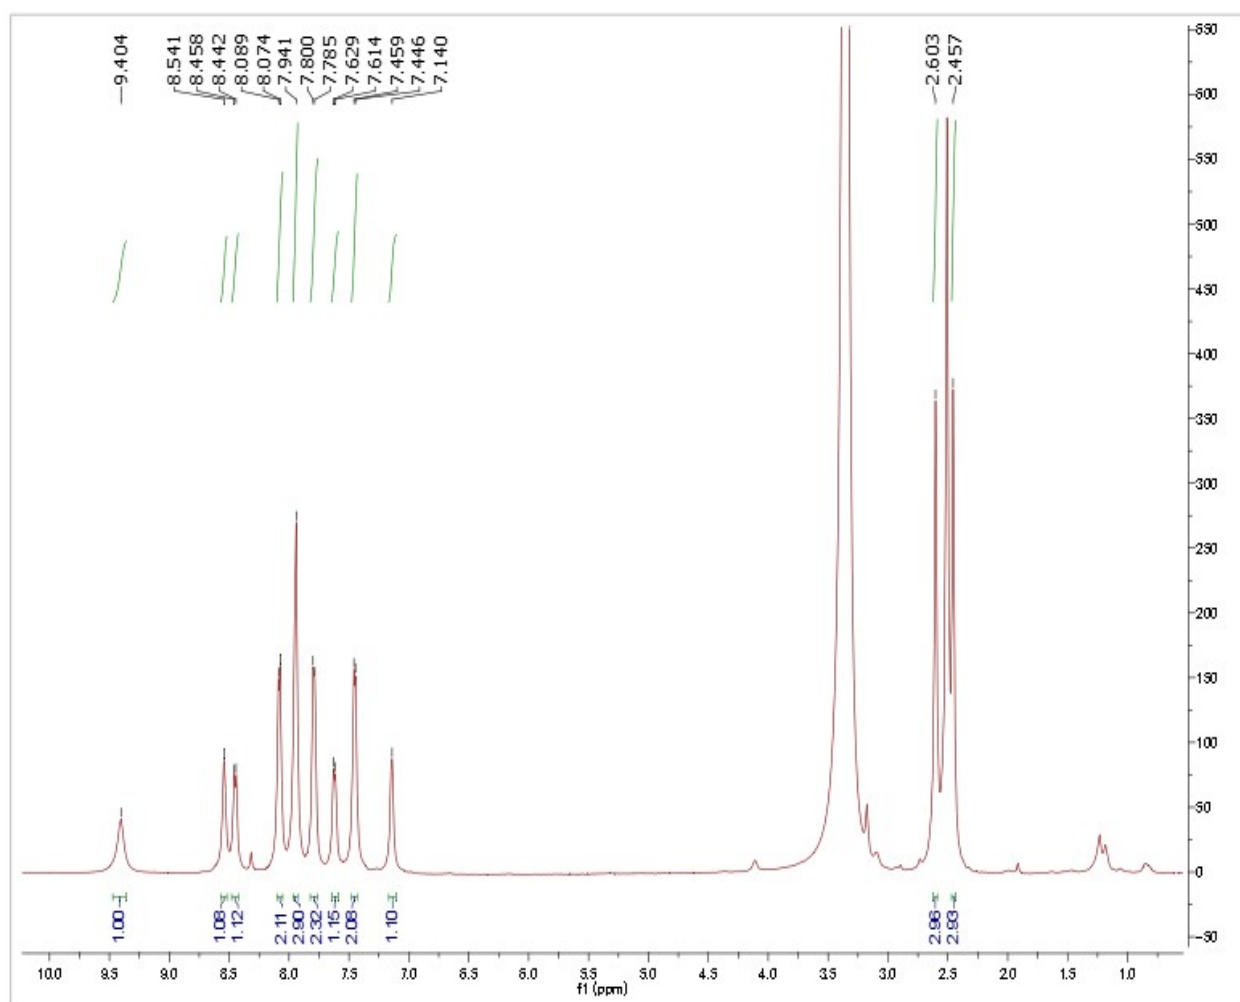

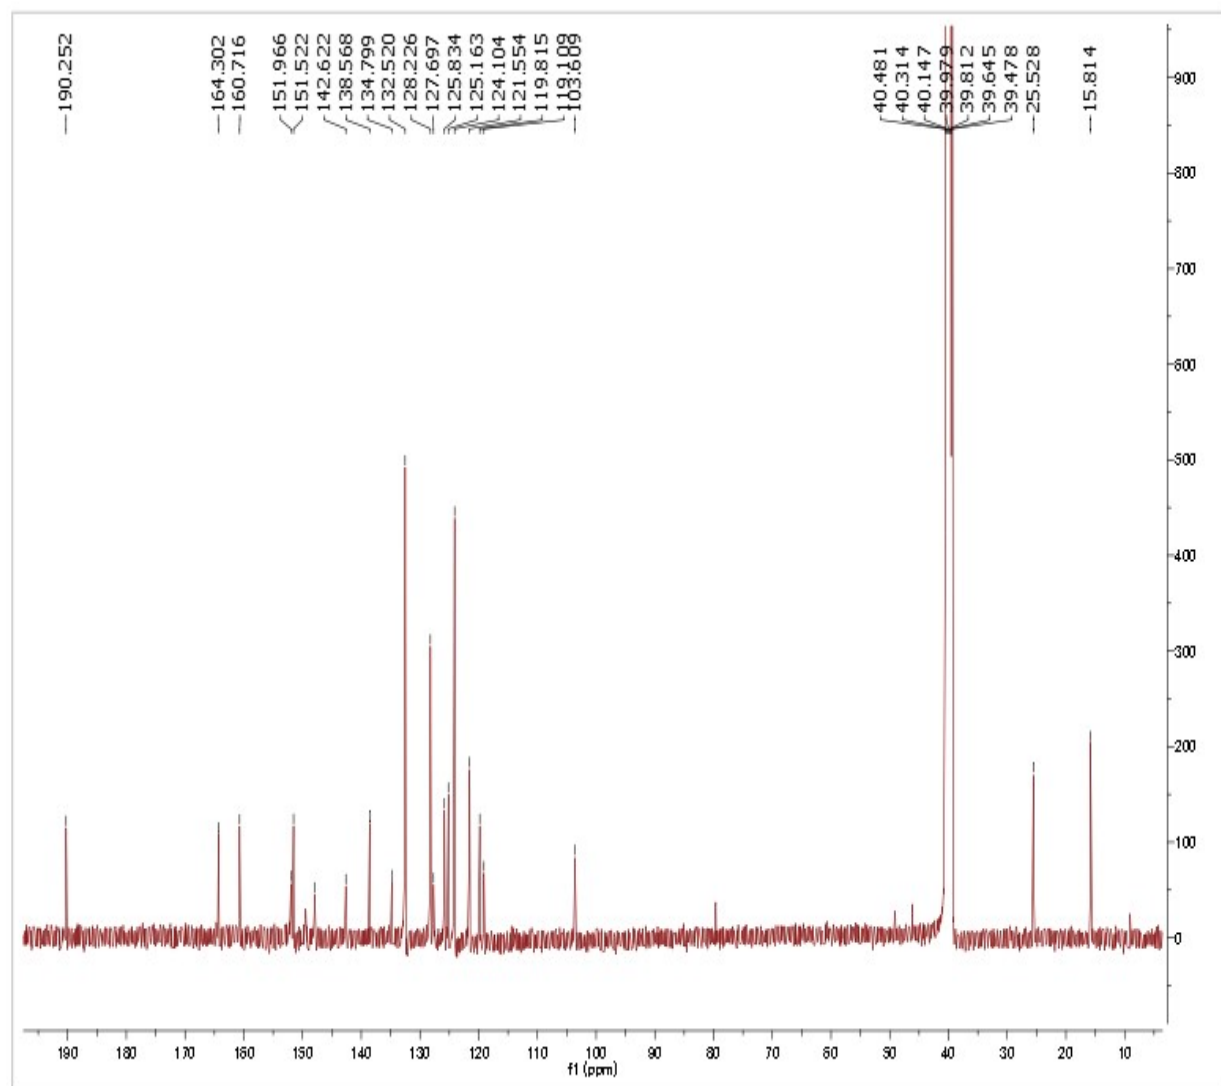



Seizo20240722\_04 161 (1.432) AM2 (Ar,10000.0,0.00,0.00)

1: TOF MS ES+  
1.59e5

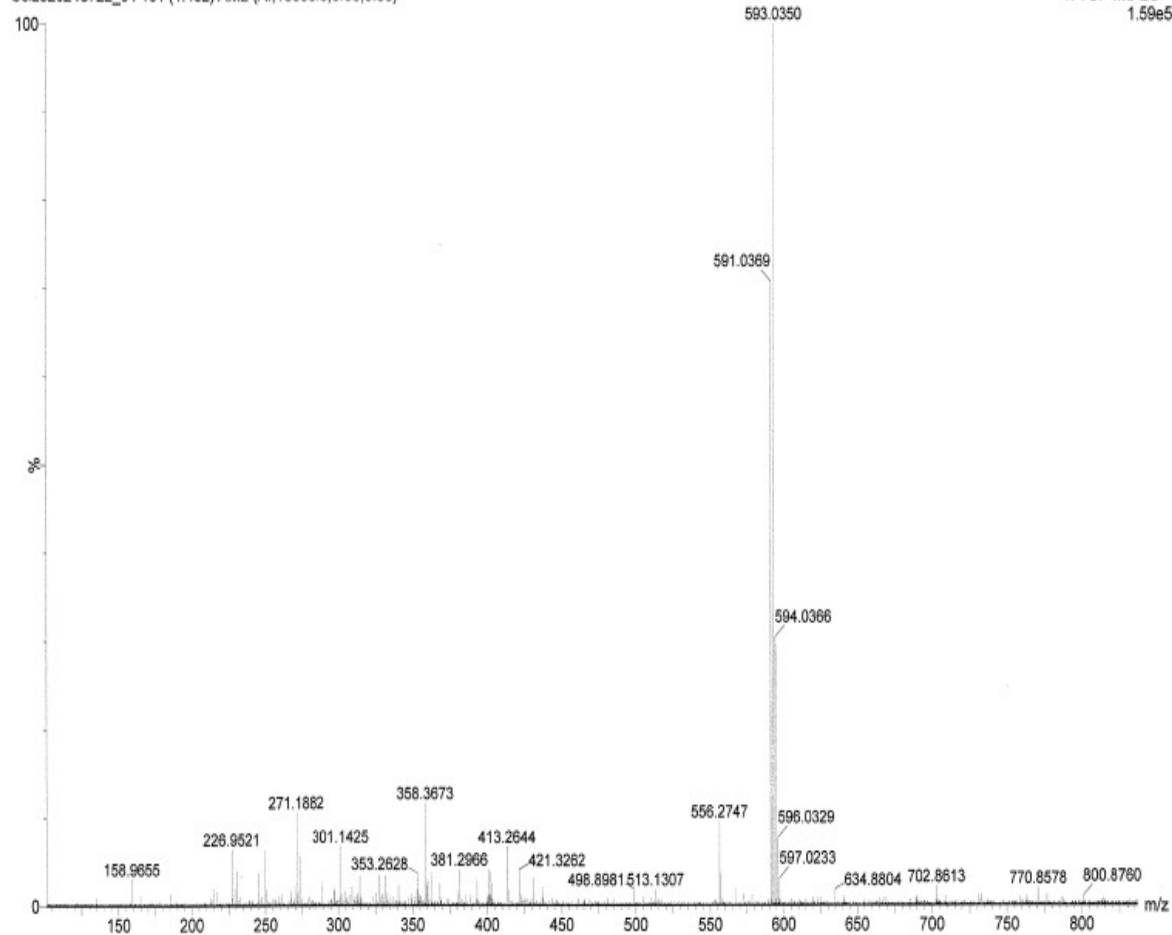

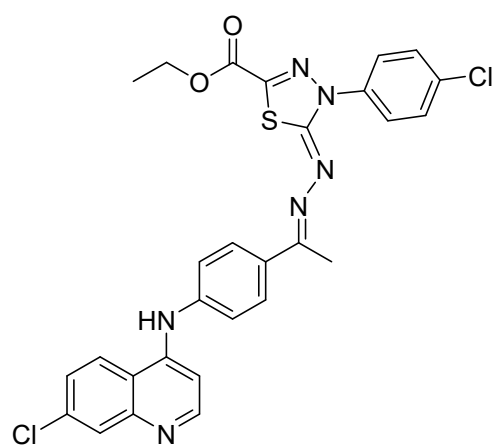

**8c**

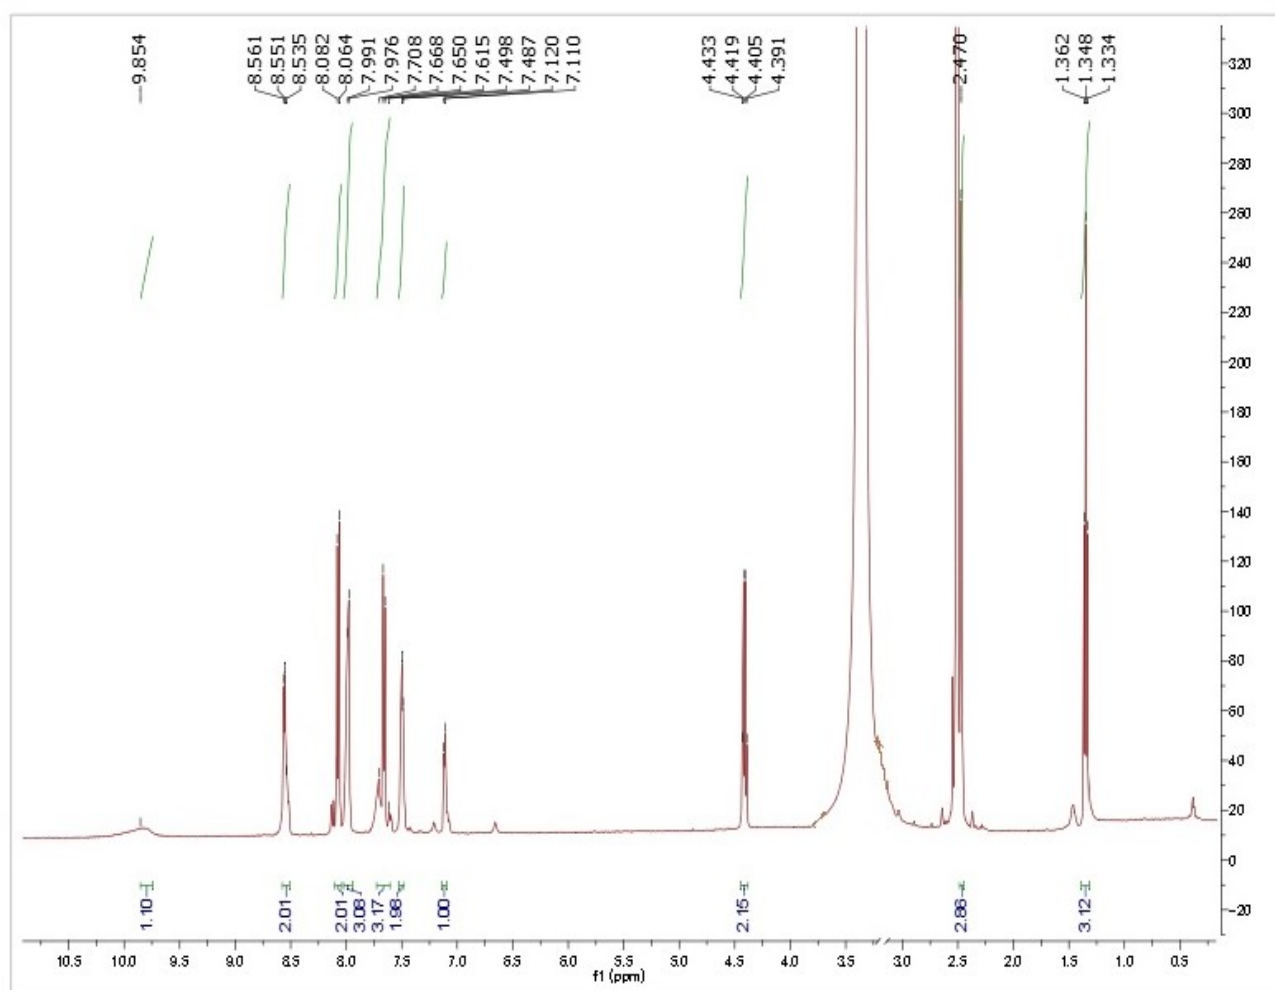

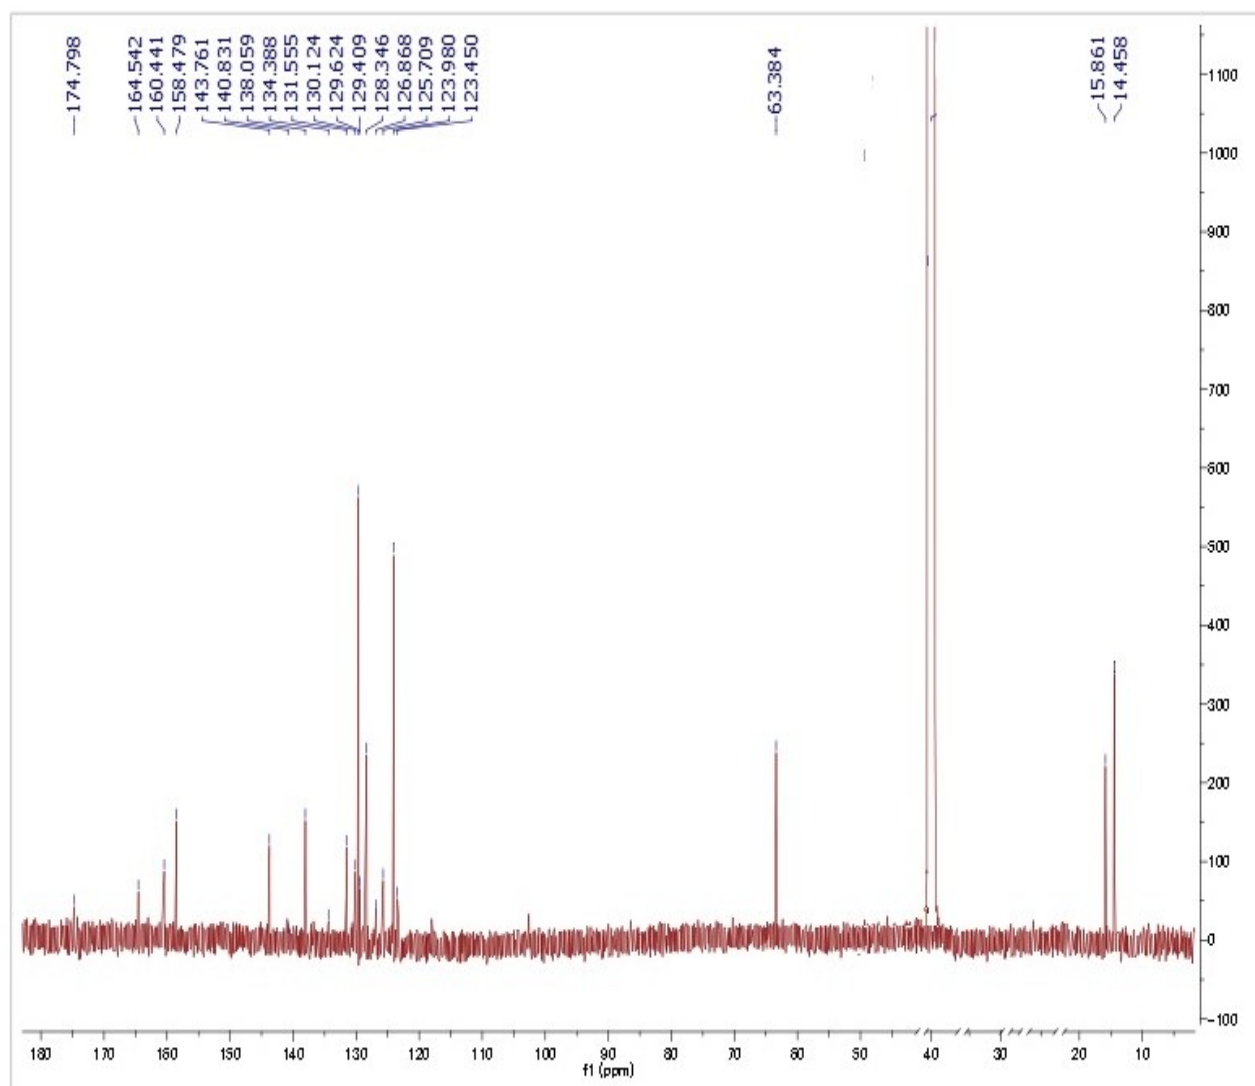

Seizo20240722\_05 128 (1.149) AM2 (Ar,10000.0,0.00,0.00)

1: TOF MS ES+  
6.58e5

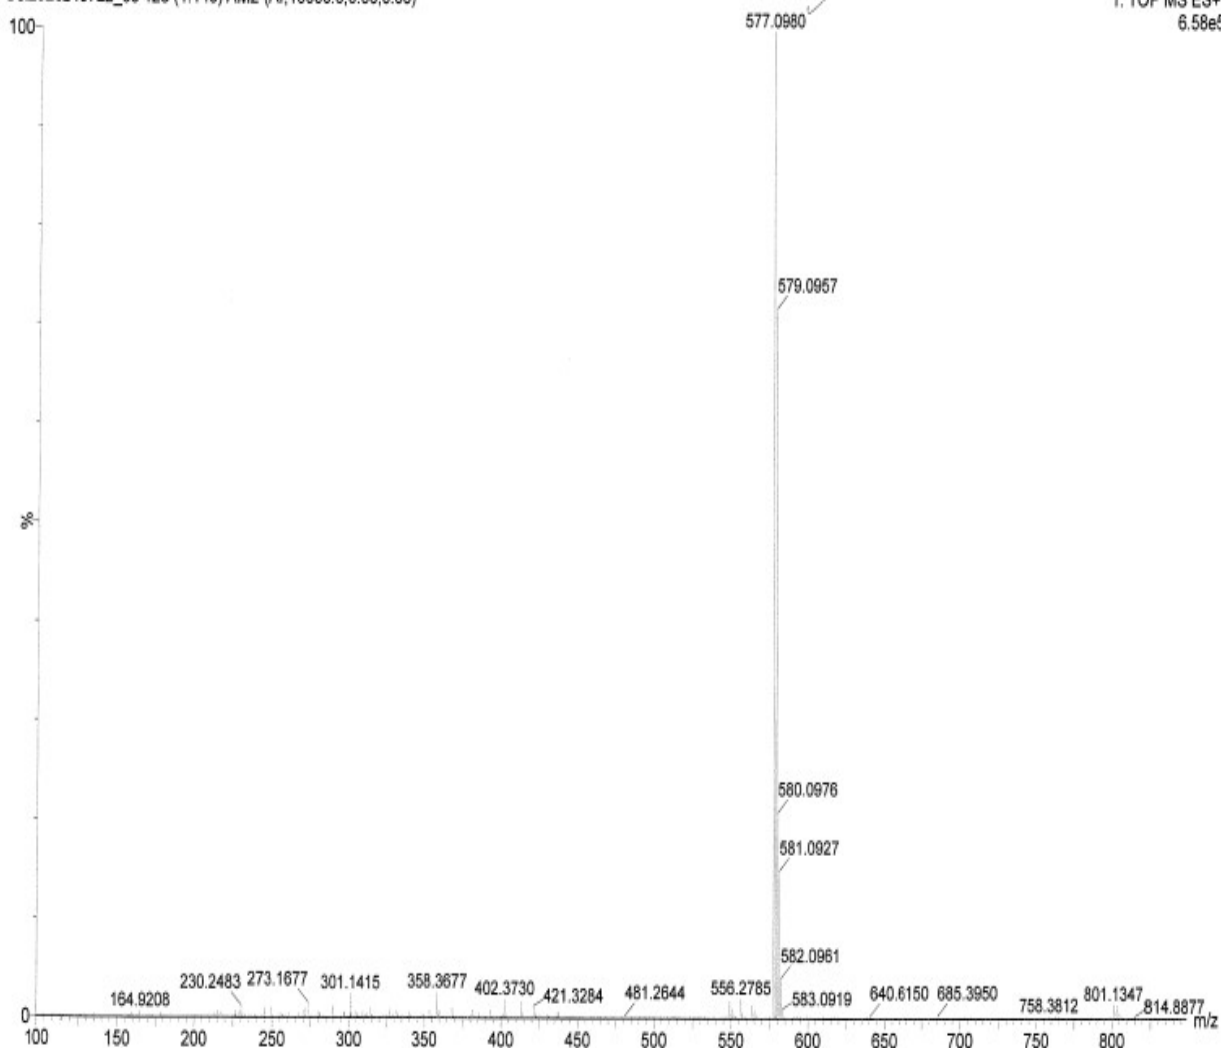

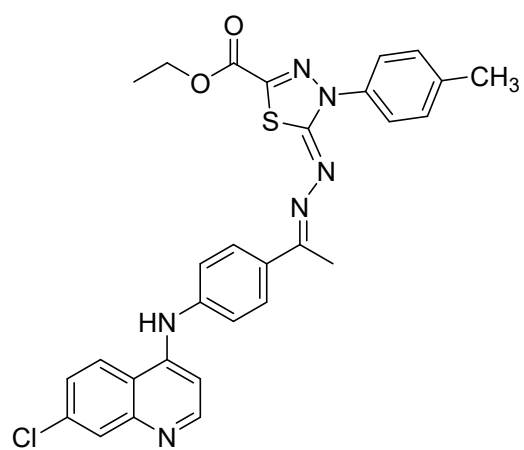

**8d**

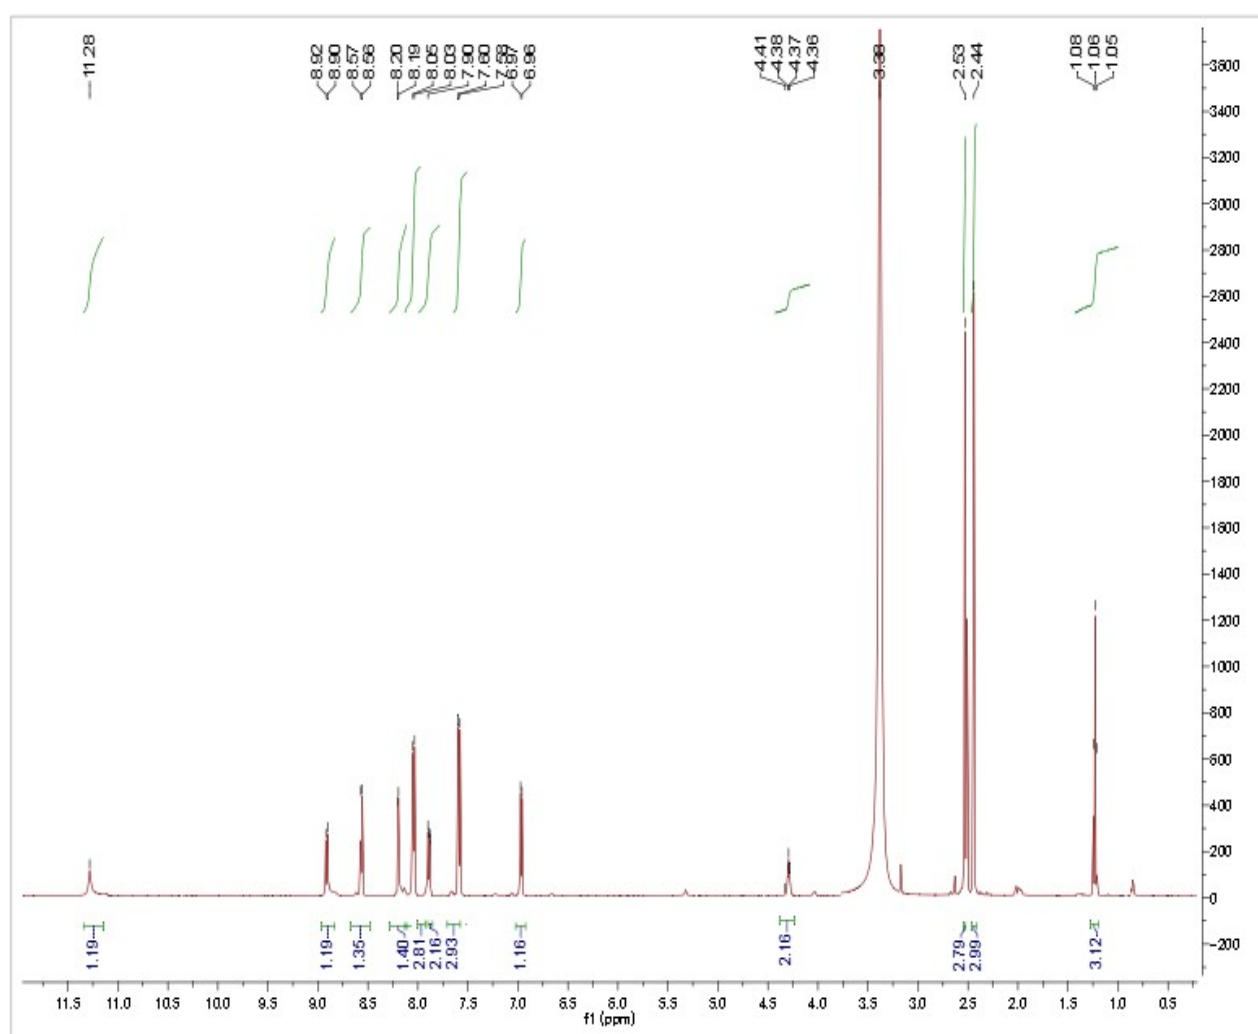

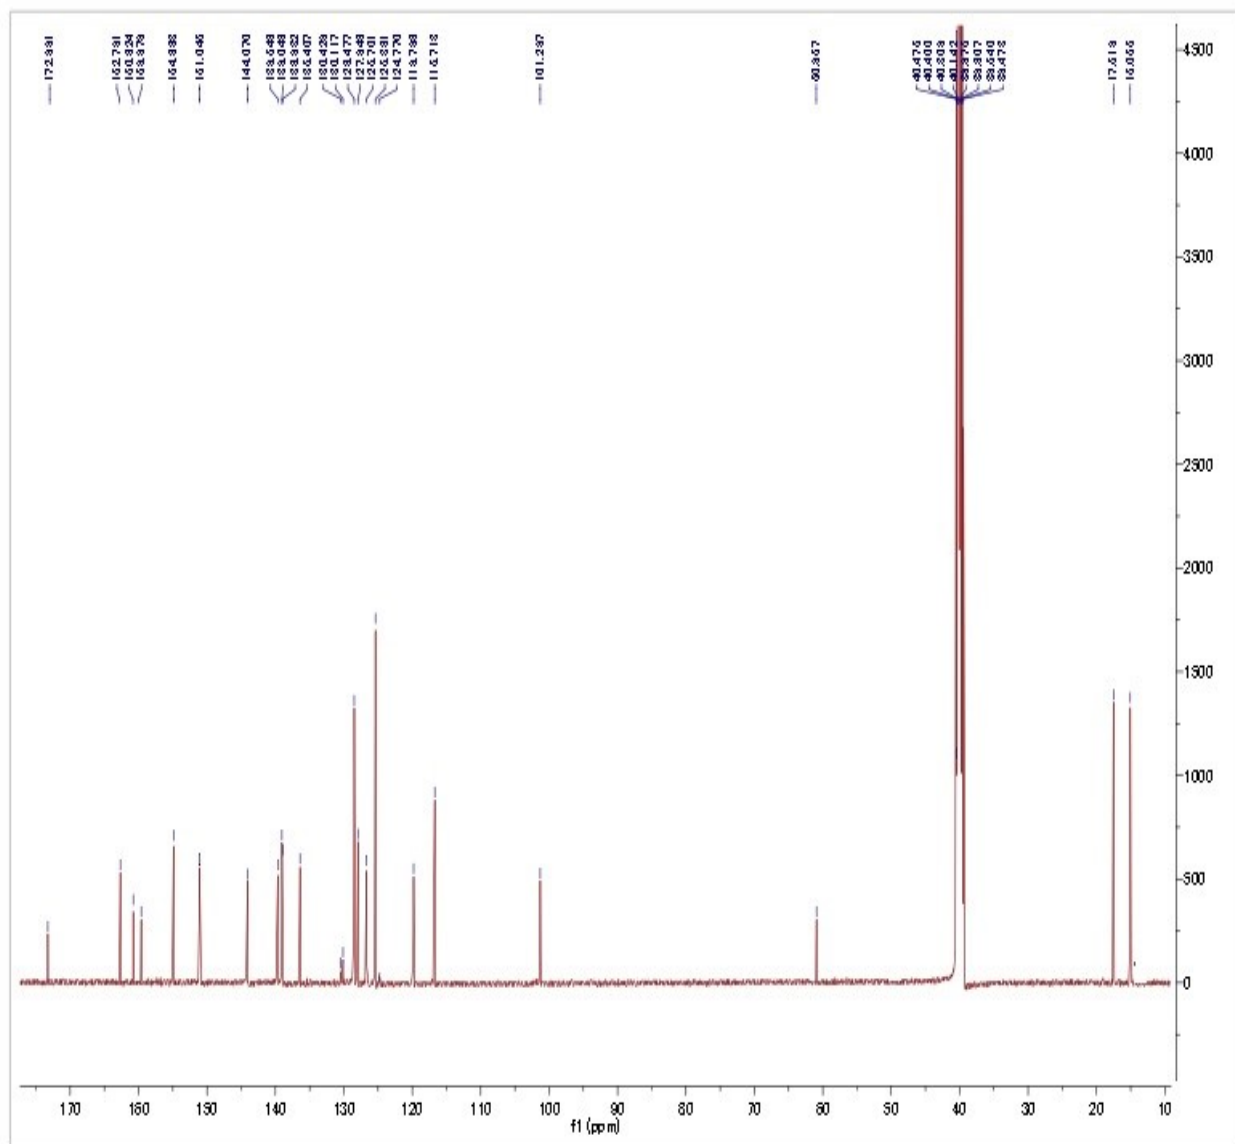

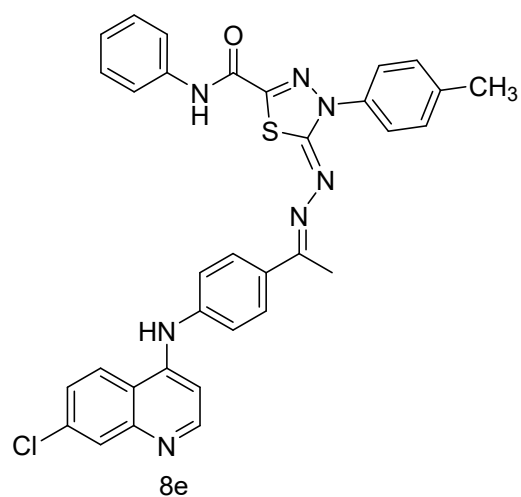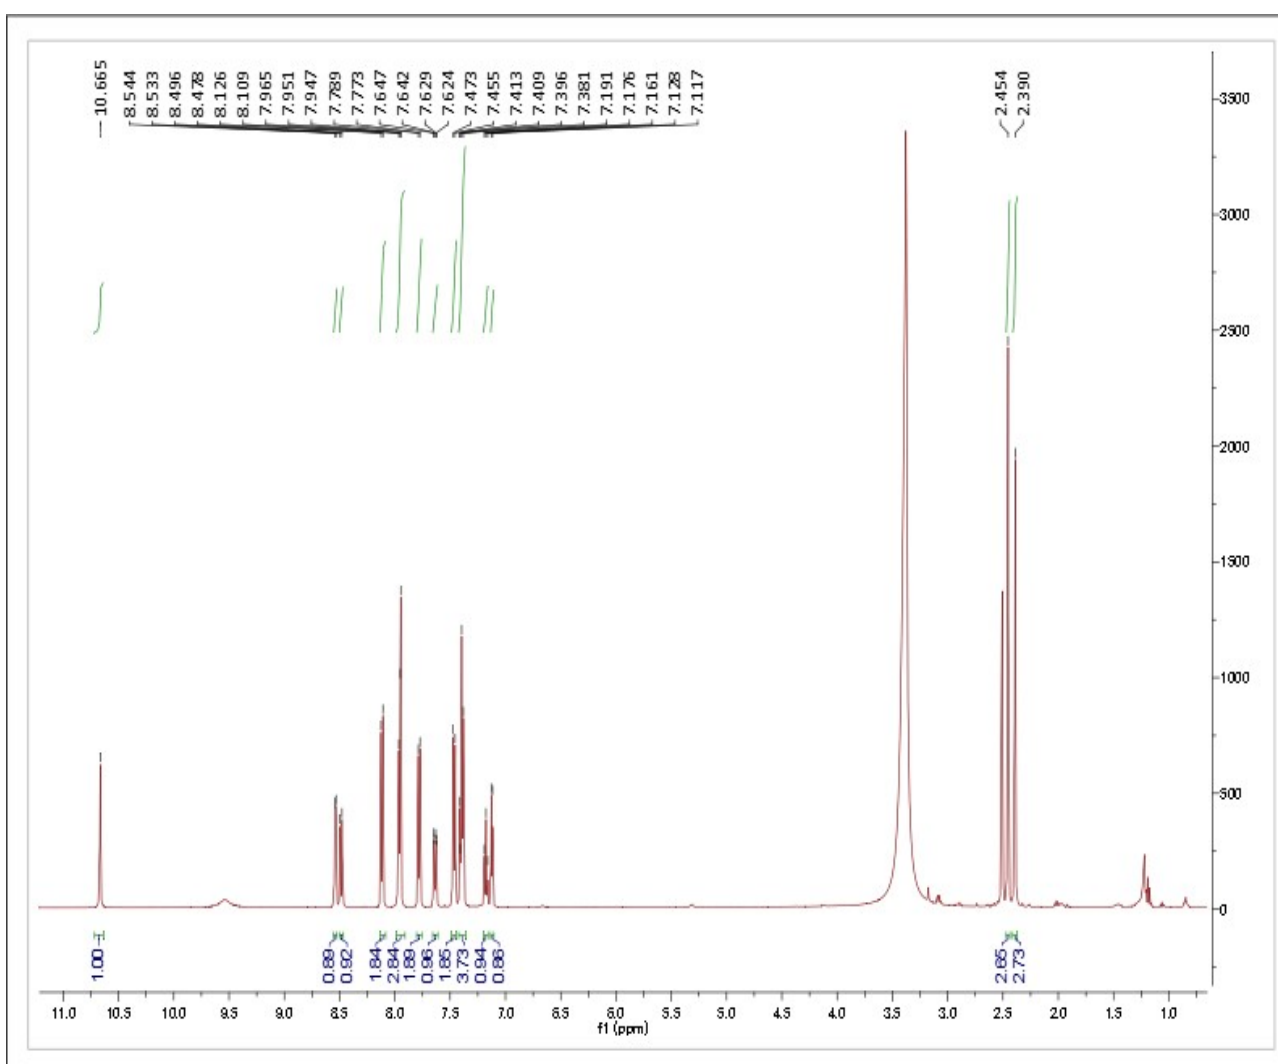

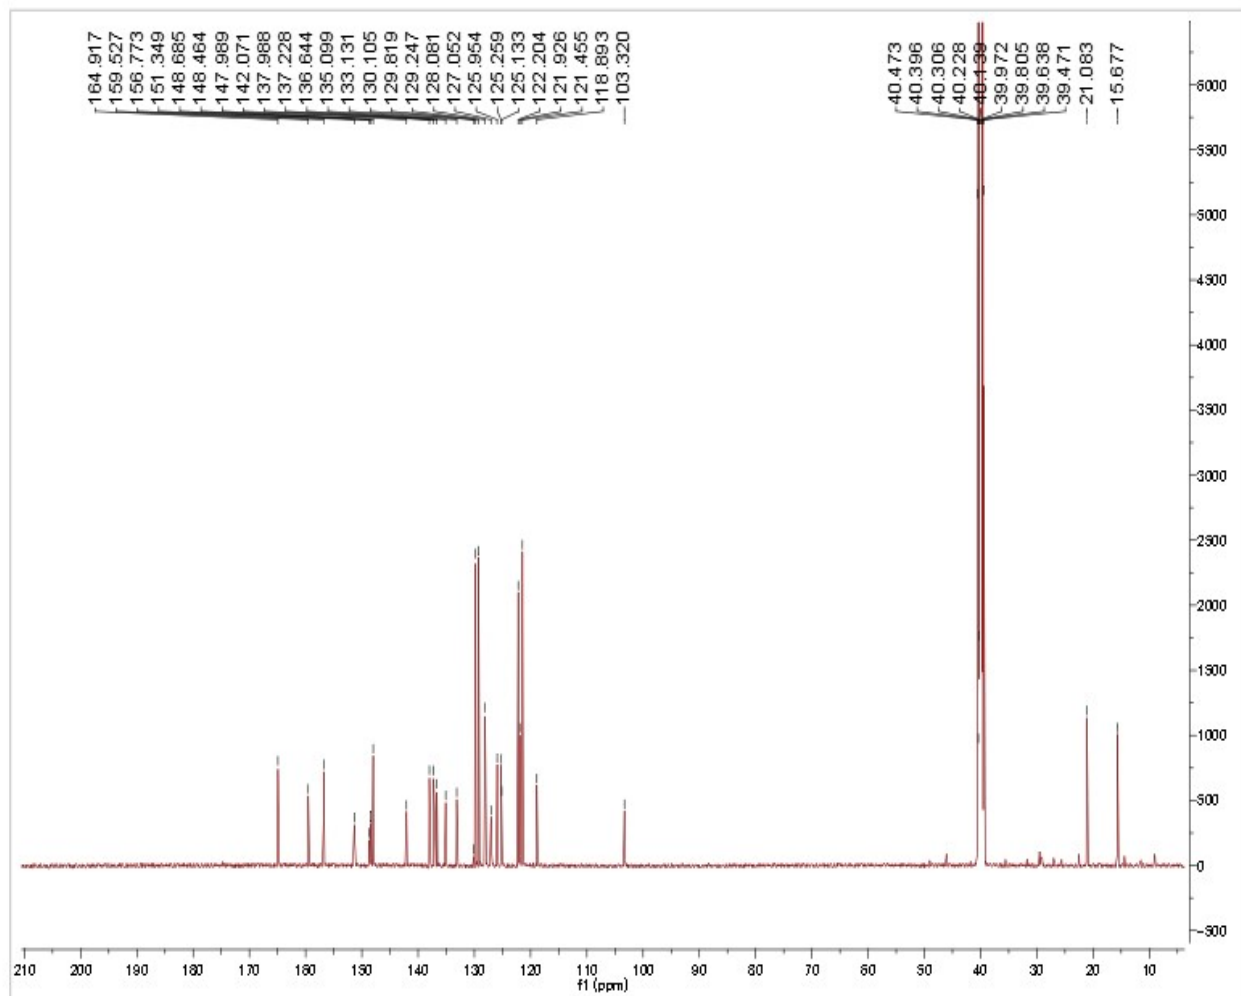



Seizo20240722\_07 185 (1.649) AM2 (Ar.10000.0.0.00,0.00)

1: TOF MS ES+  
2.39e5

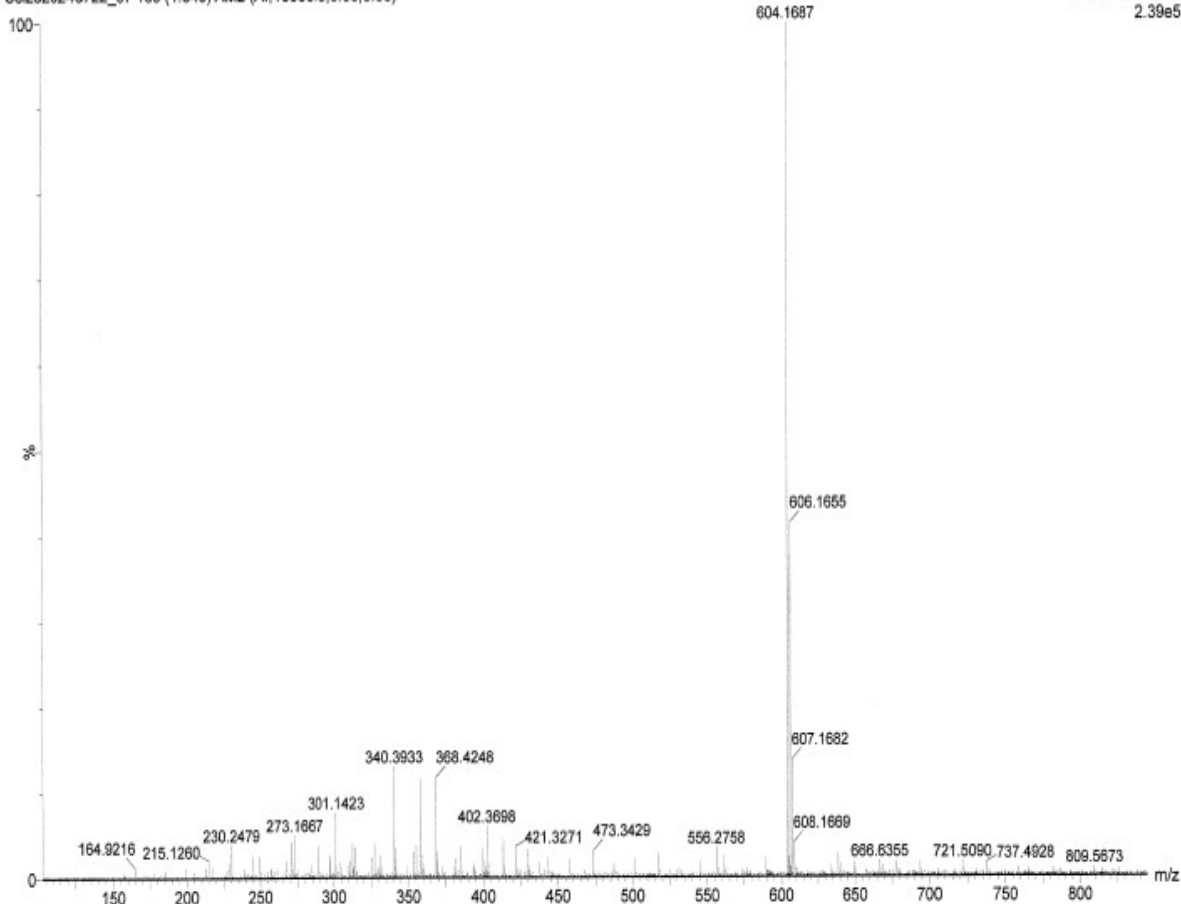

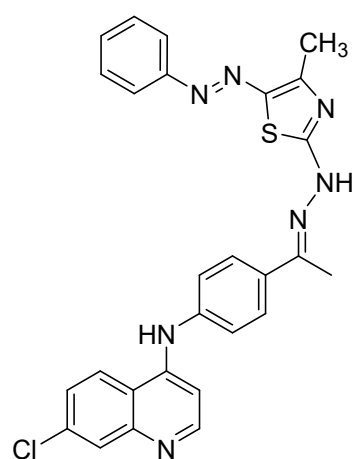

**12a**

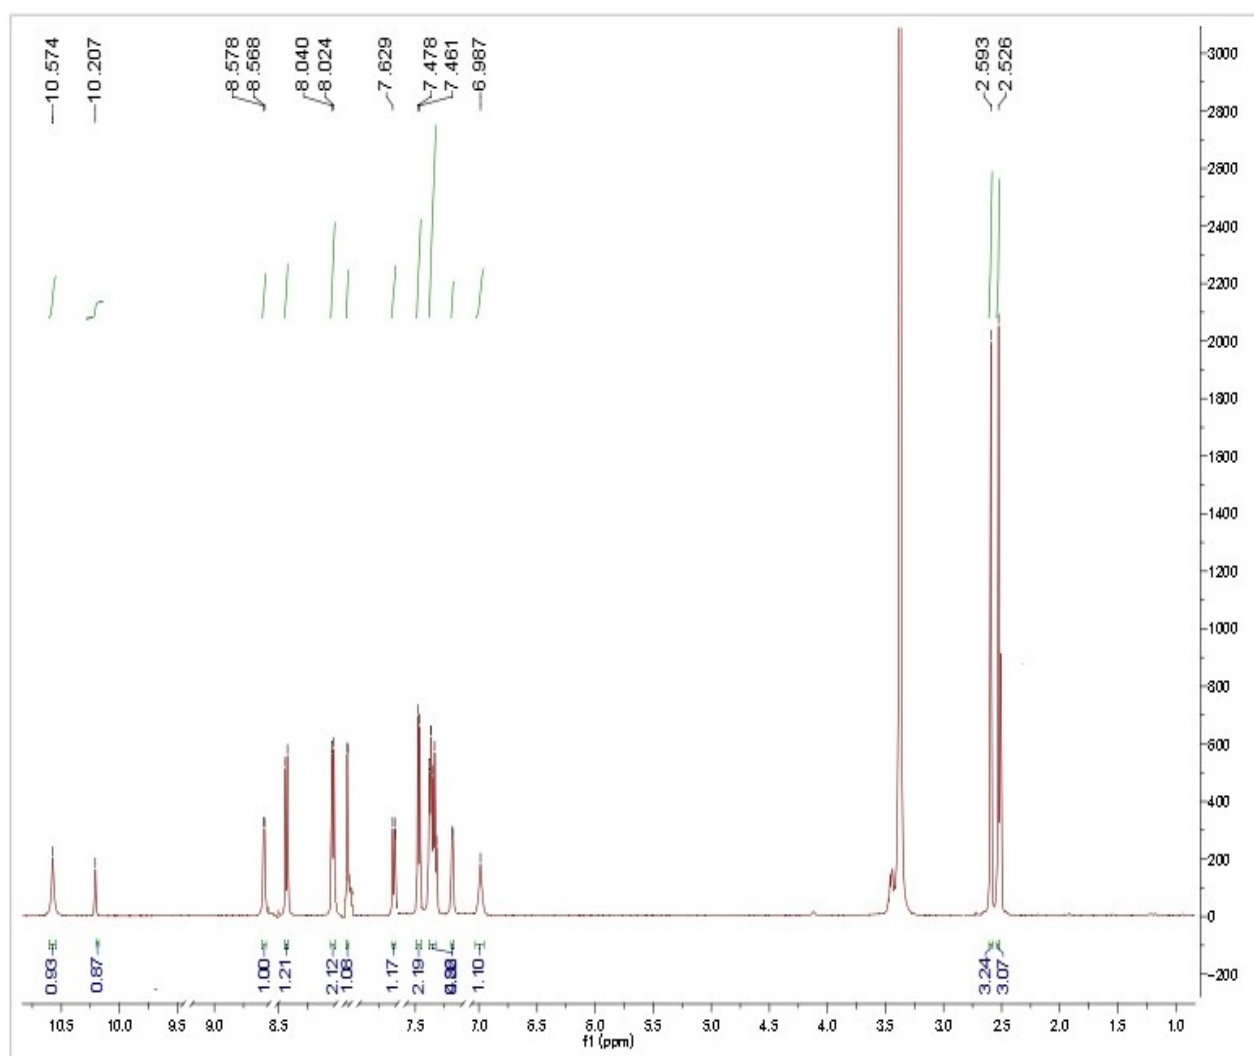

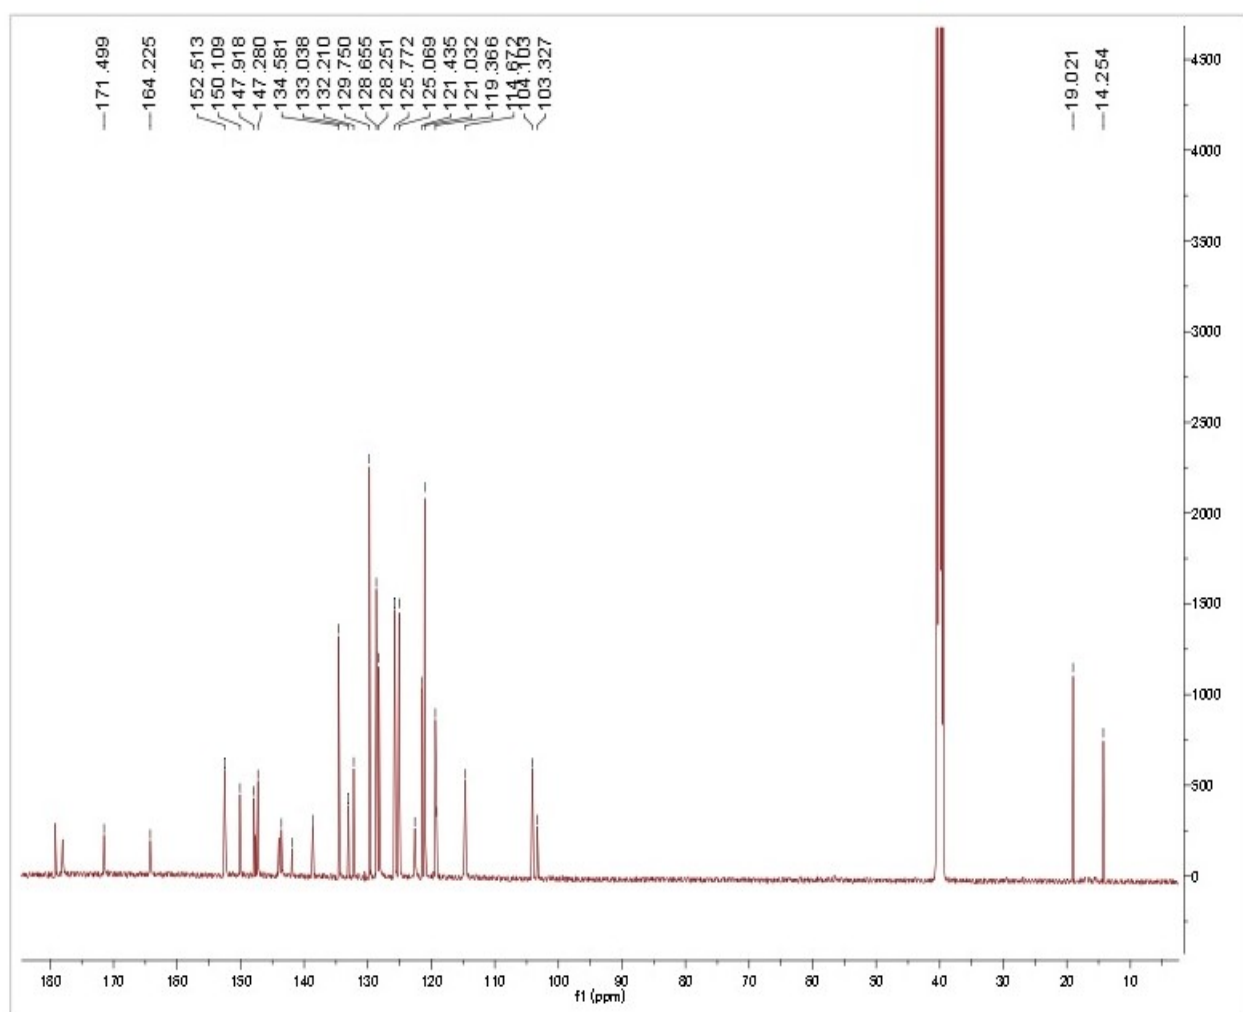

Seizo20240722\_08 110 (0.983) AM2 (Ar,10000.0,0.00,0.00)

1: TOF MS ES+  
5.21e5

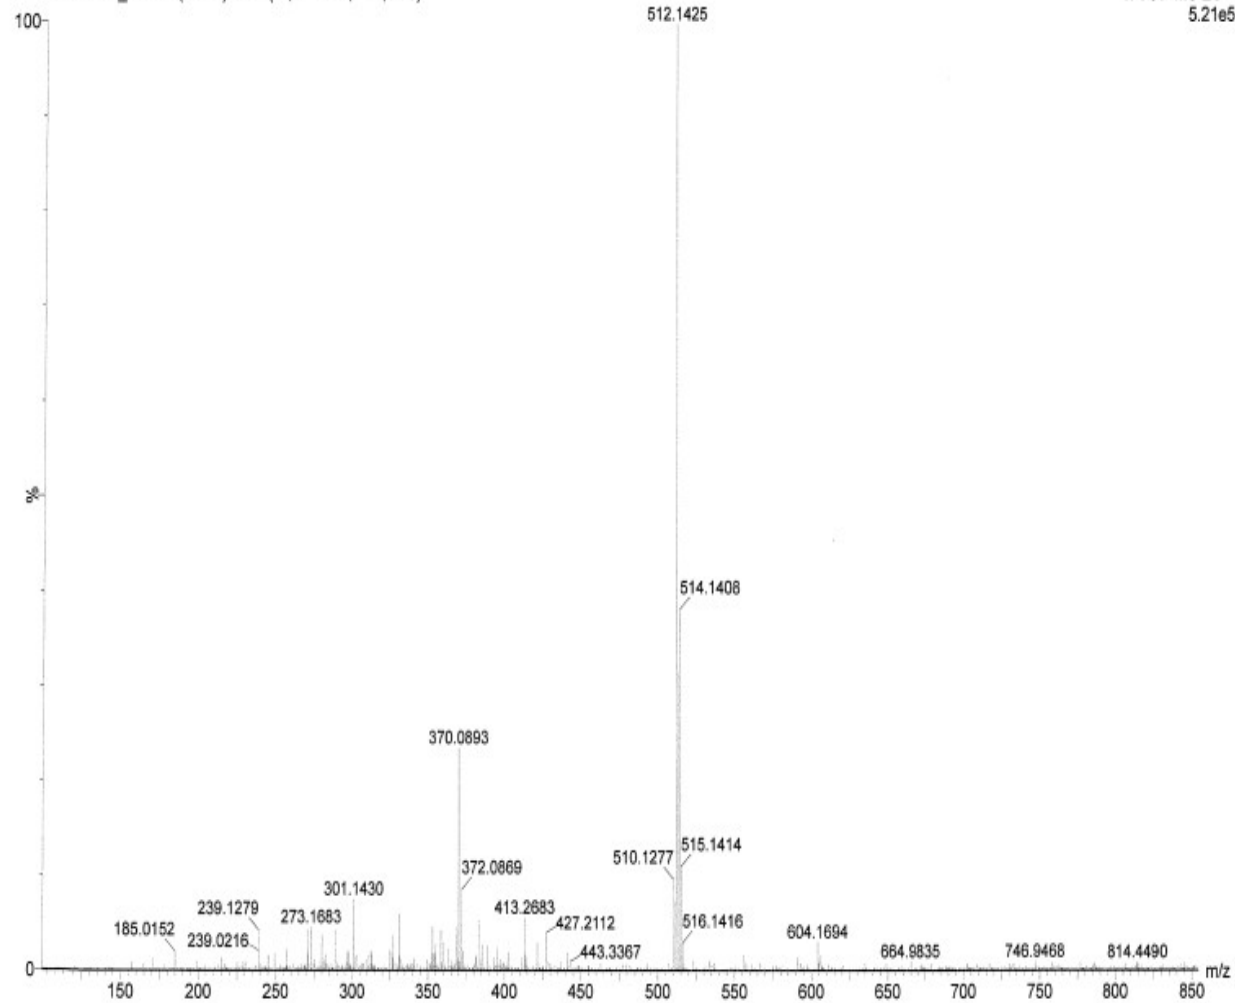

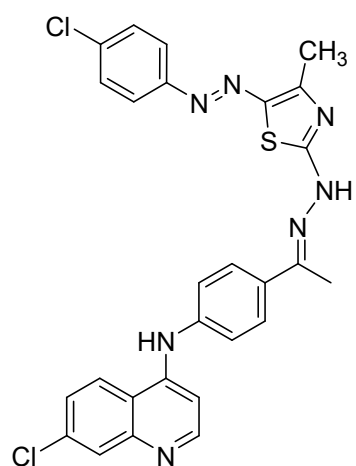

**12b**

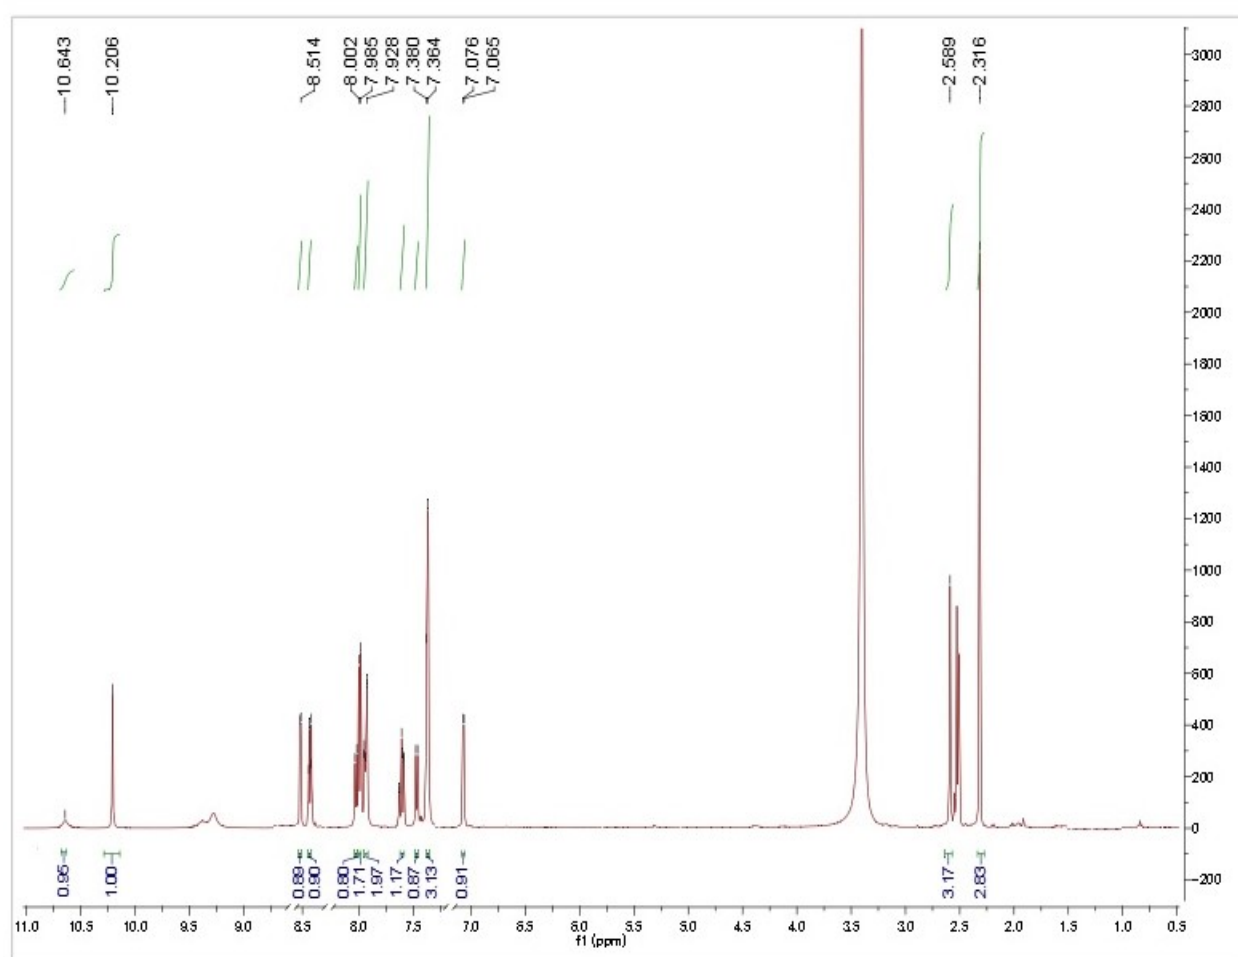

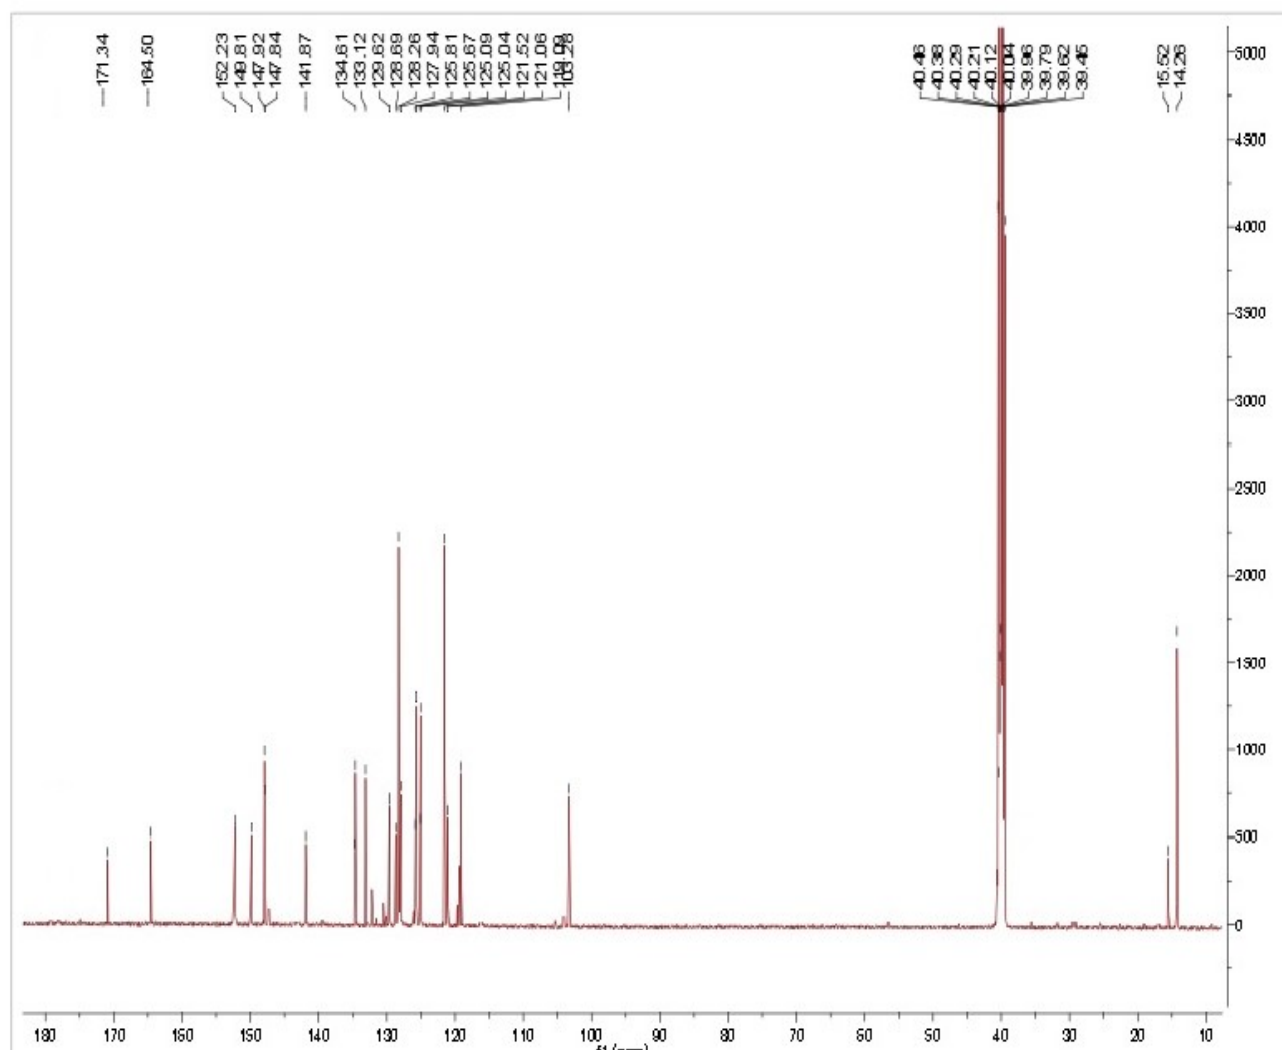

Seizo20240723\_02 264 (2.337) AM2 (Ar,10000.0,0.00,0.00)

1: TOF MS ES+  
1.02e5

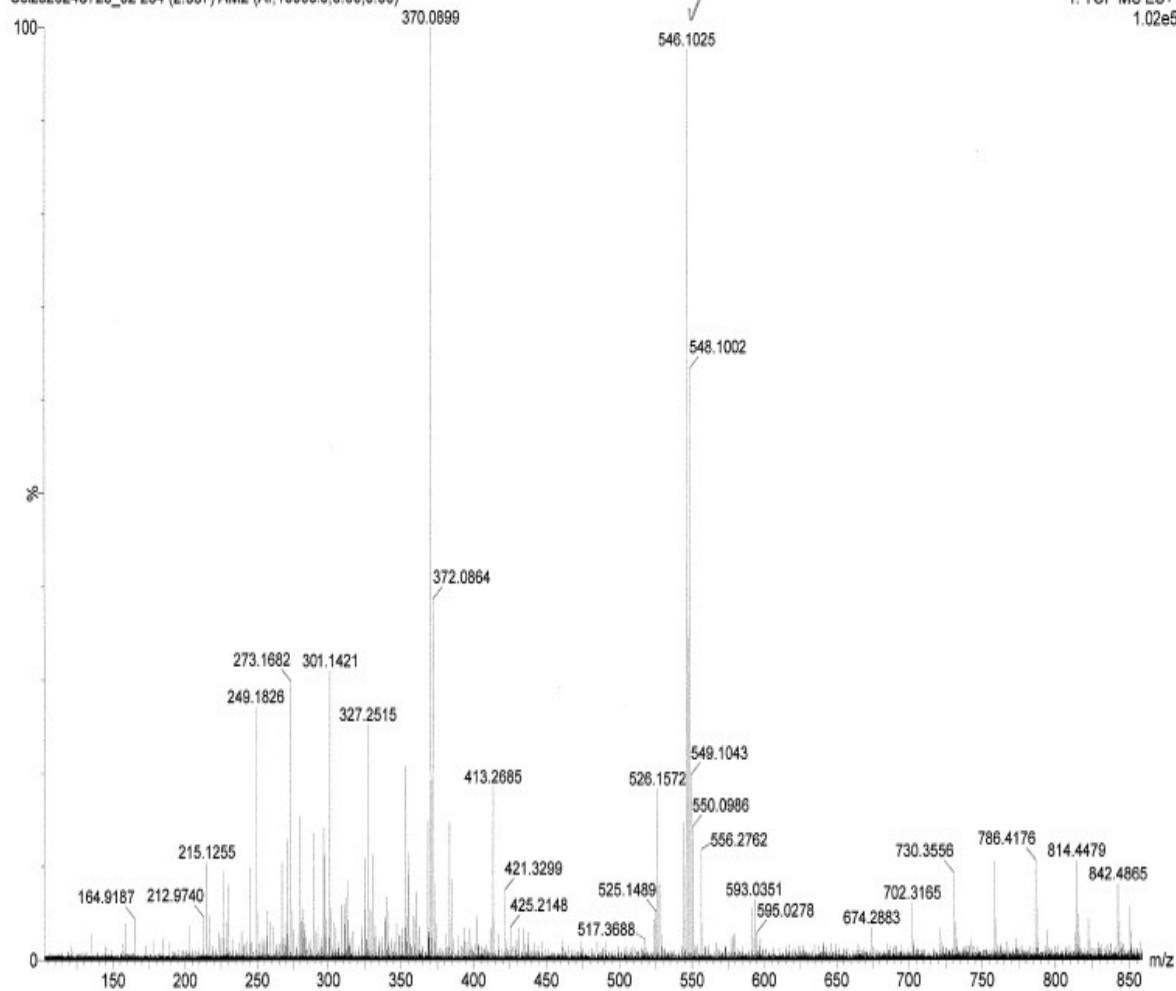

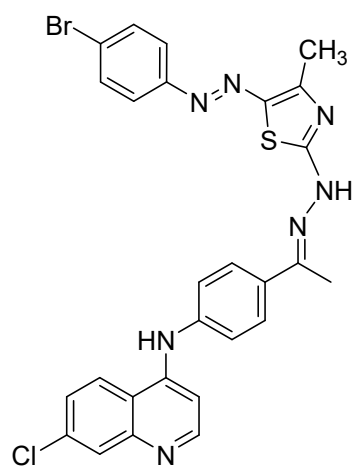

**12c**

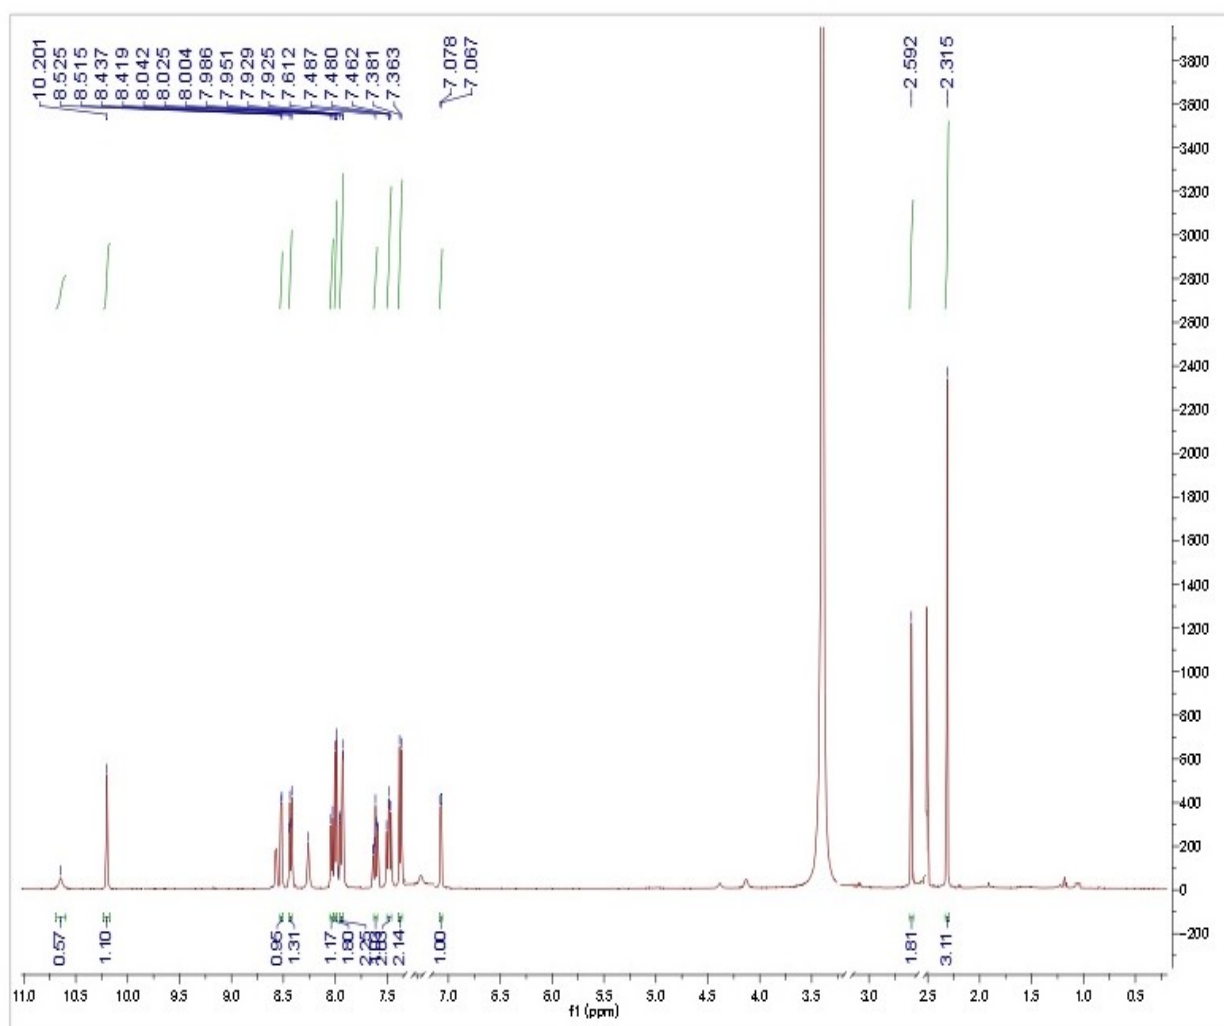



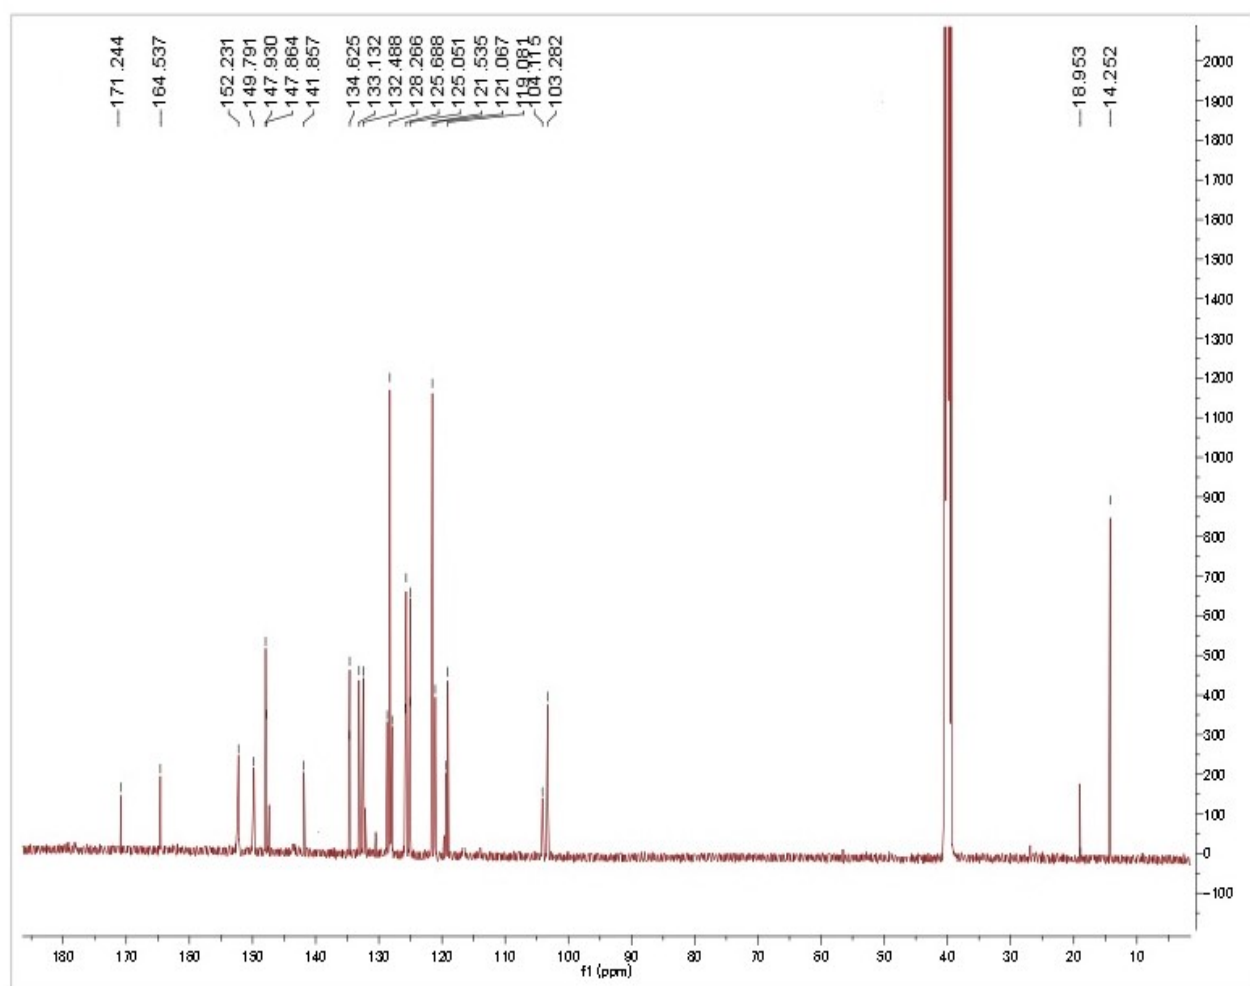

Seizo20240723\_08 181 (1.614) AM2 (Ar,10000.0,0.00,0.00)

1: TOF MS ES+  
1.89e5

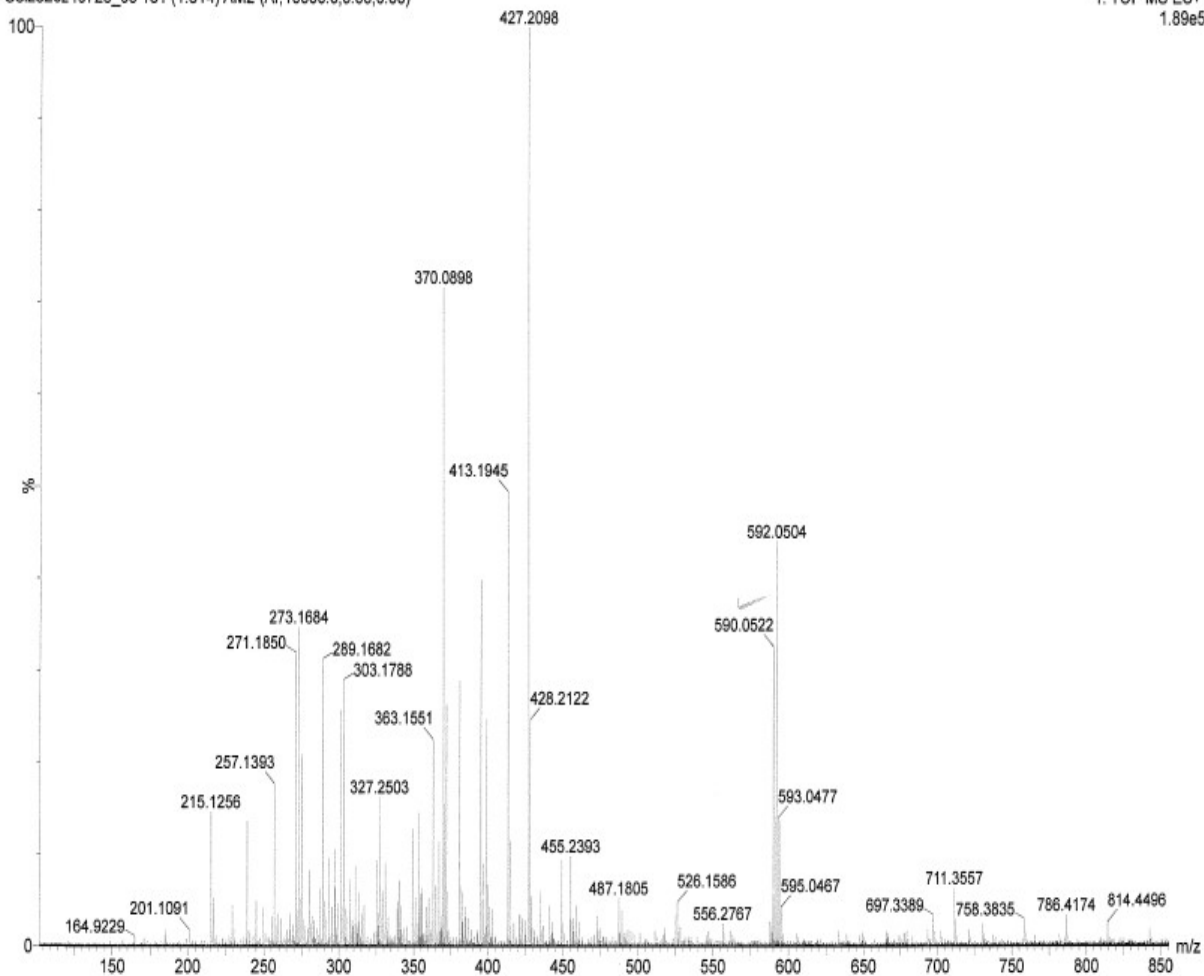

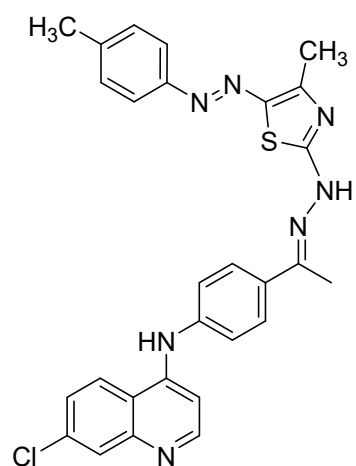

**12d**

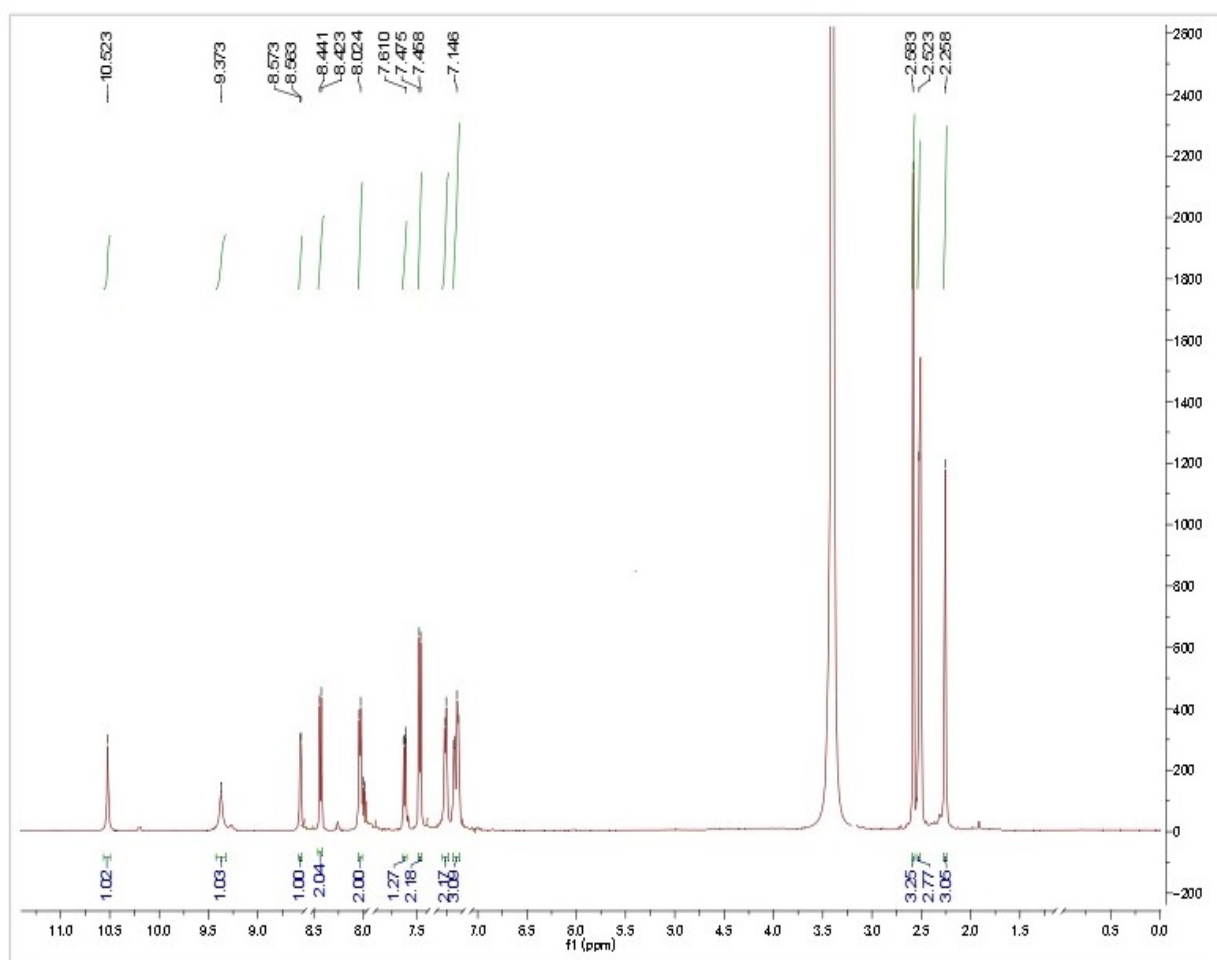

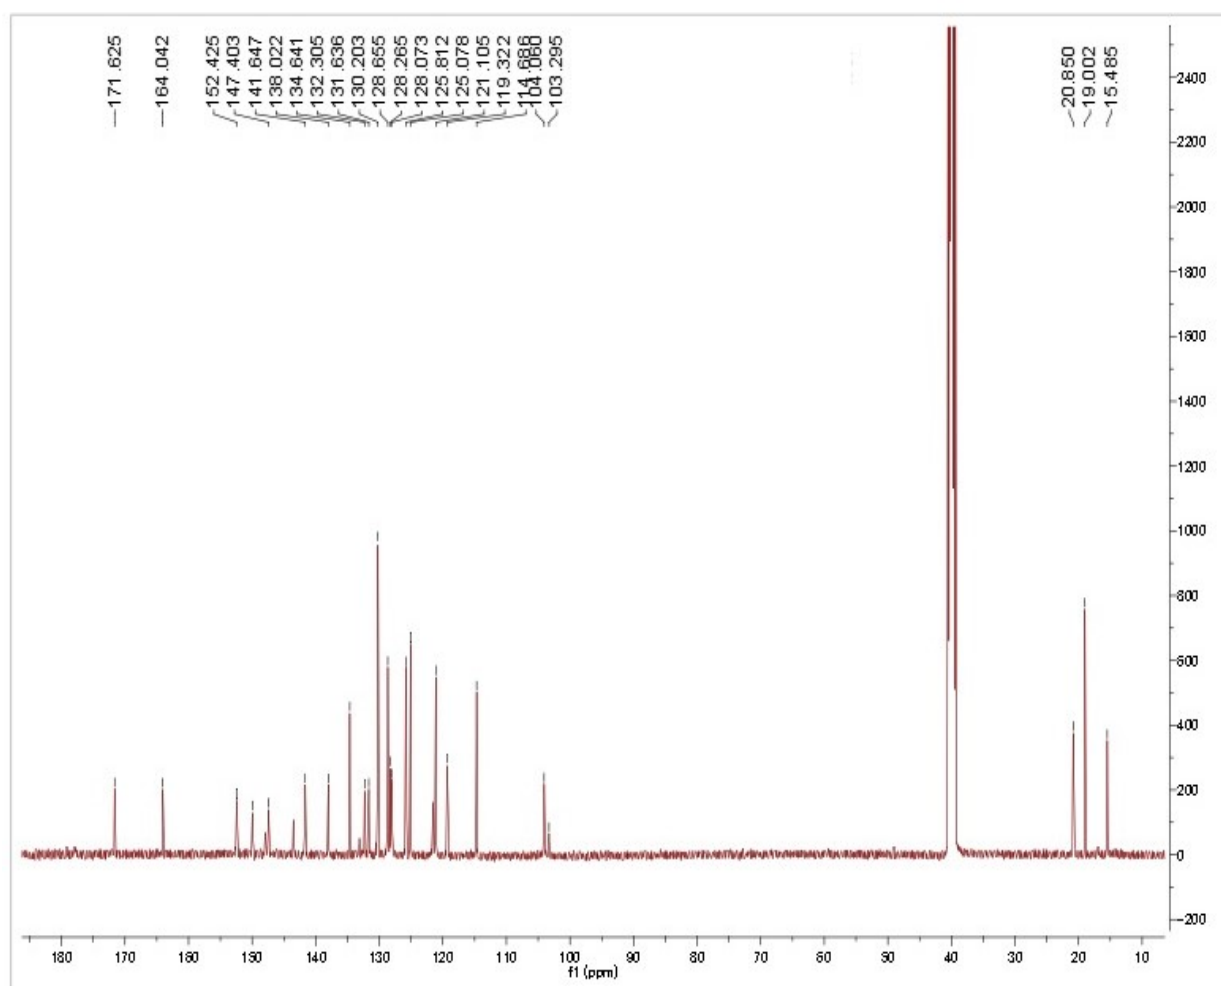

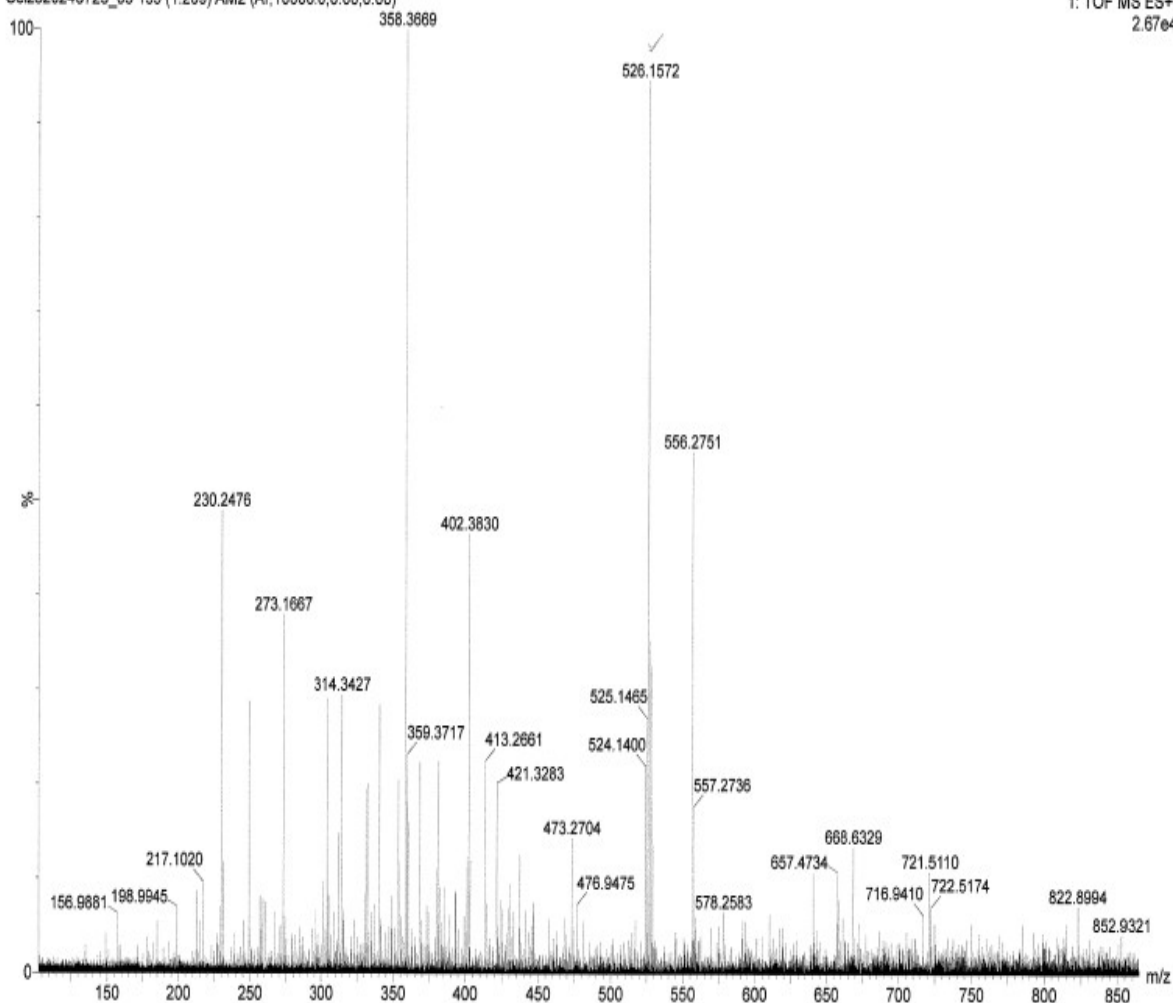

Charts of HPLC

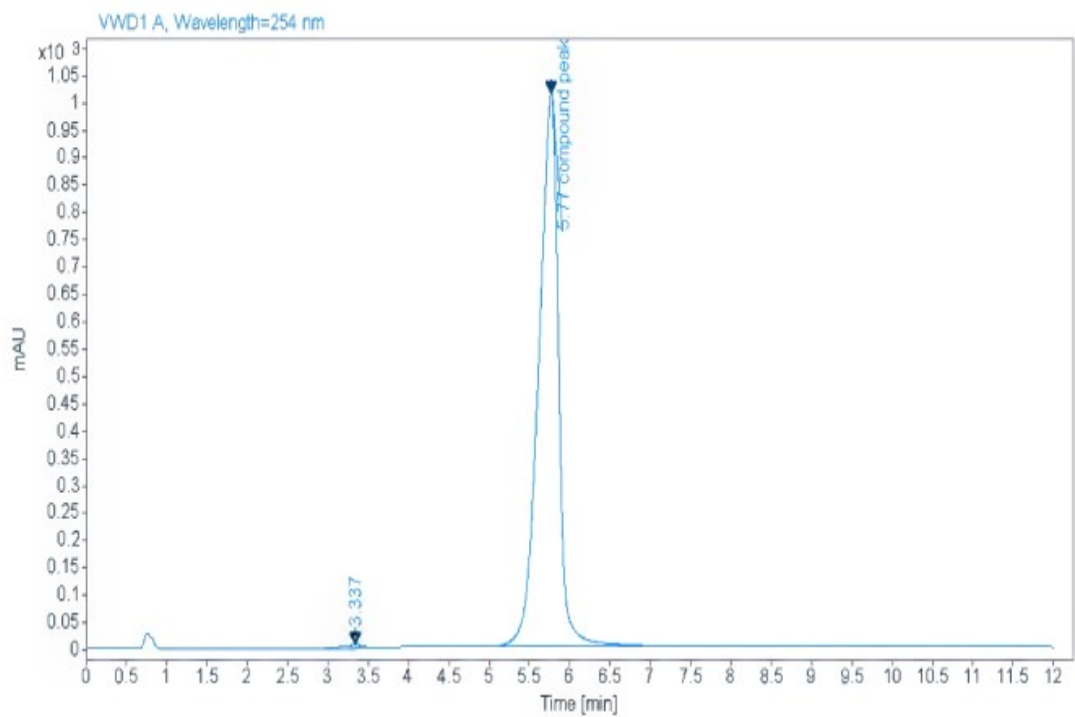

Signal: VWD1 A, Wavelength=254 nm

| RT [min] | Type | Width [min] | Area       | Height    | Area%   | Name          |
|----------|------|-------------|------------|-----------|---------|---------------|
| 3.337    | BV   | 0.2564      | 101.3273   | 5.3740    | 0.5929  |               |
| 5.770    | BB   | 0.2646      | 16991.2751 | 1011.5413 | 99.4071 | compound peak |
| Sum      |      |             | 17092.6024 |           |         |               |

HPLC for compound 5

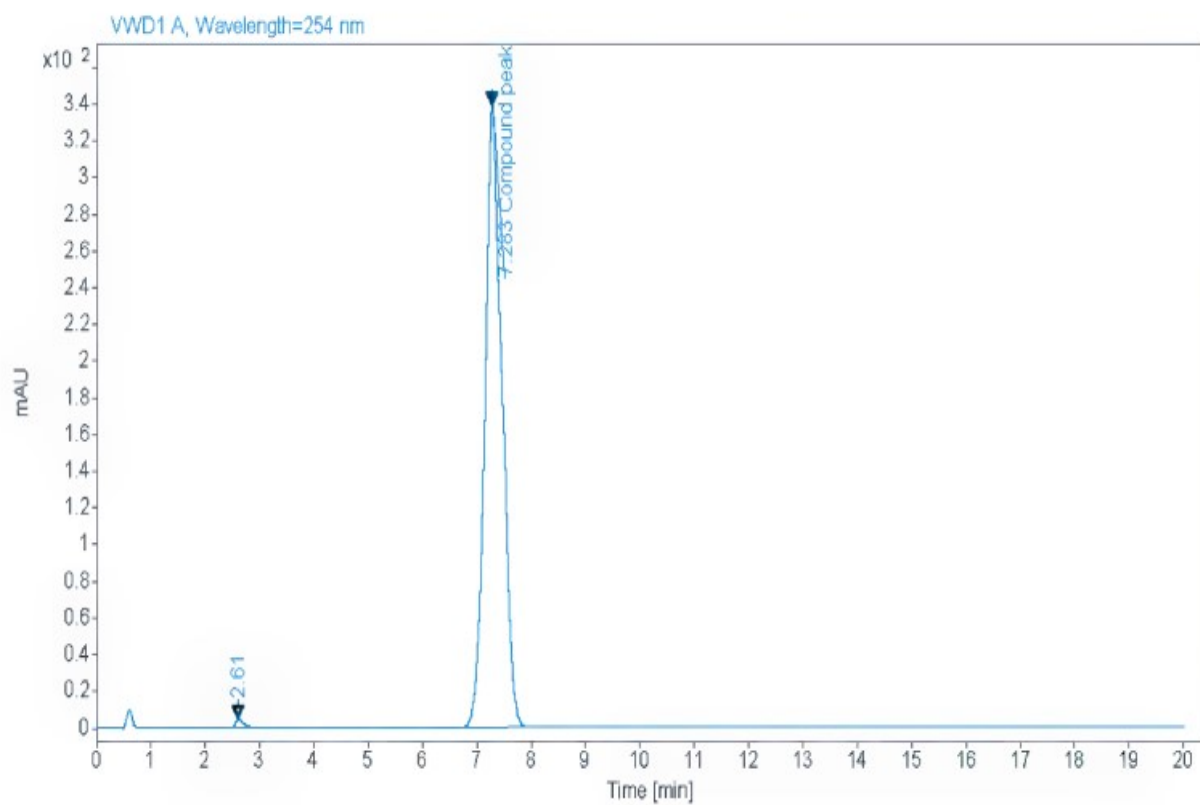

Signal: VWD1 A, Wavelength=254 nm

| RT [min] | Type | Width [min] | Area      | Height   | Area%   | Name          |
|----------|------|-------------|-----------|----------|---------|---------------|
| 2.610    | VV   | 0.1804      | 50.1489   | 4.5290   | 0.6038  |               |
| 7.283    | BV   | 0.3404      | 8255.9166 | 339.0104 | 99.3962 | Compound peak |
| Sum      |      |             | 8306.0655 |          |         |               |

**HPLC for compound 8b**

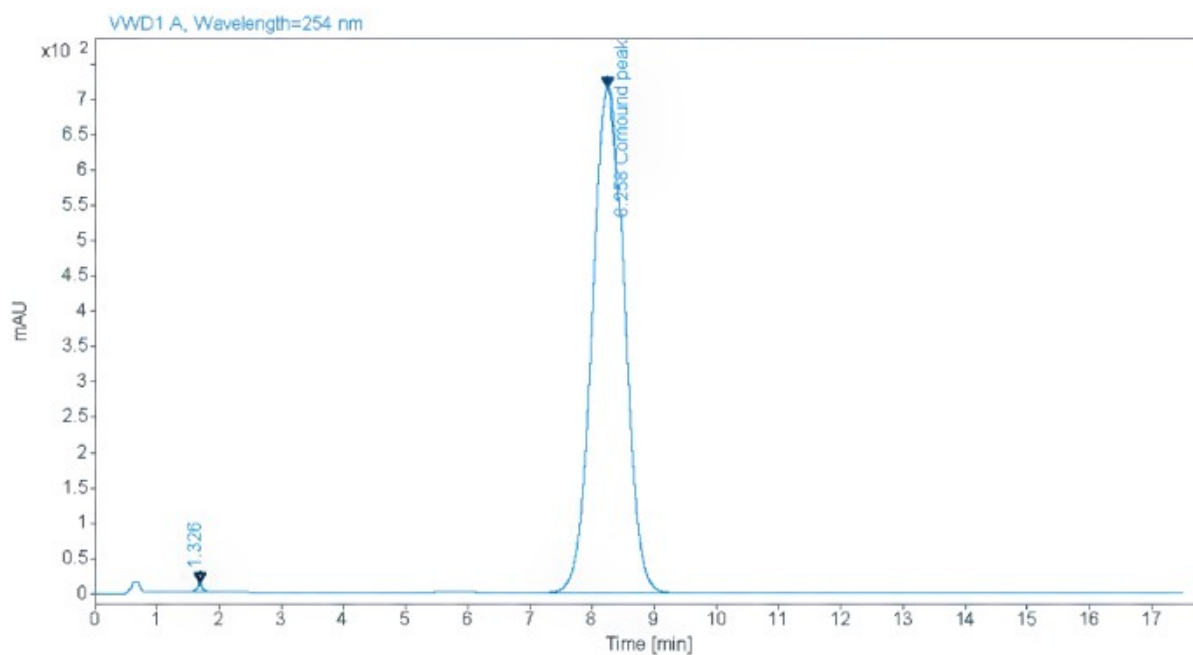

Signal: VWD1 A, Wavelength=254 nm

| RT [min] | Type | Width [min] | Area       | Height   | Area%   | Name          |
|----------|------|-------------|------------|----------|---------|---------------|
| 1.326    | VB   | 0.0651      | 47.2621    | 11.1678  | 0.1562  |               |
| 8.258    | VB   | 0.6022      | 30221.1952 | 715.9852 | 99.8438 | Compound peak |
| Sum      |      |             | 30268.4573 |          |         |               |

**HPLC for compound 8d**



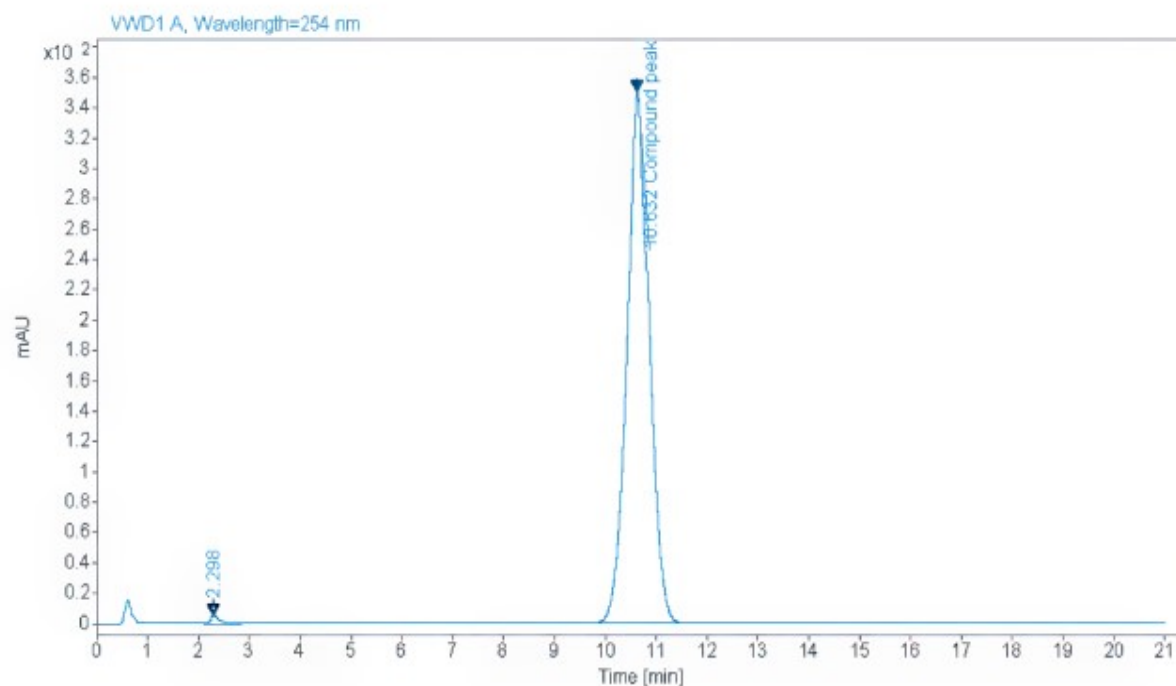

**Signal:** VWD1 A, Wavelength=254 nm

| RT [min] | Type | Width [min] | Area       | Height   | Area%   | Name          |
|----------|------|-------------|------------|----------|---------|---------------|
| 2.298    | VV   | 0.1846      | 60.9981    | 5.2683   | 0.4273  |               |
| 10.632   | BV   | 0.5386      | 14214.2833 | 350.2096 | 99.5727 | Compound peak |
| Sum      |      |             | 14275.2814 |          |         |               |

**HPLC for compound 12a**

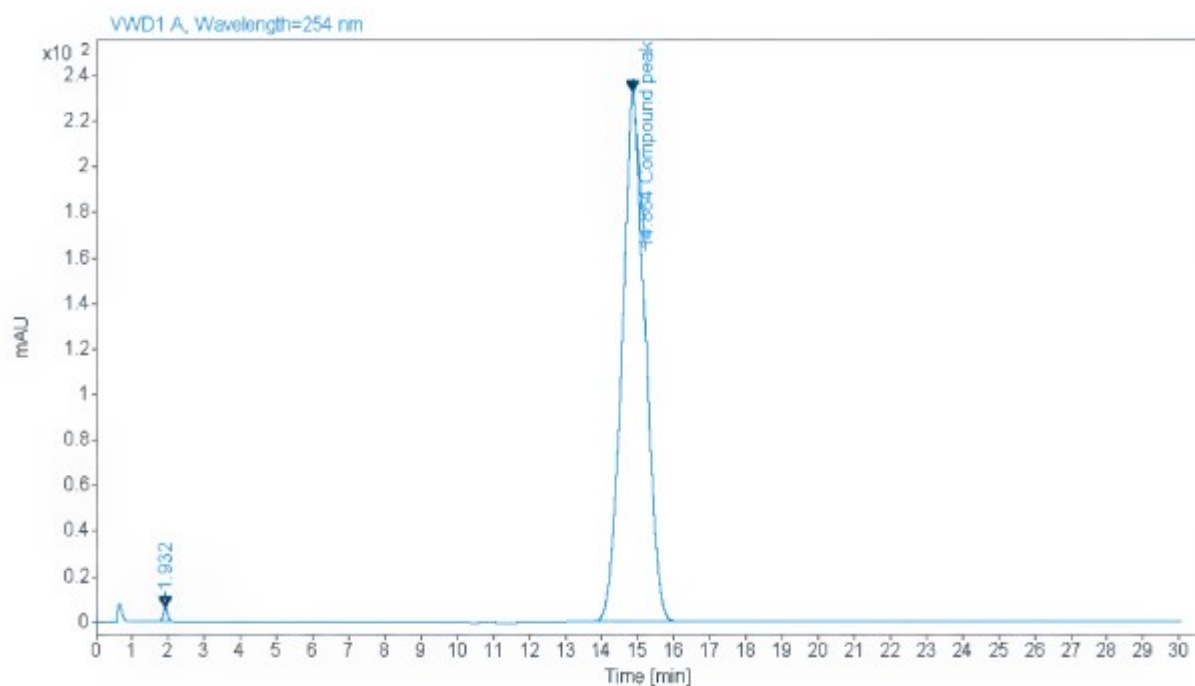

Signal: VWD1 A, Wavelength=254 nm

| RT [min] | Type | Width [min] | Area       | Height   | Area%   | Name          |
|----------|------|-------------|------------|----------|---------|---------------|
| 1.932    | BB   | 0.5998      | 261.5290   | 5.3801   | 1.8811  |               |
| 14.864   | BB   | 0.7763      | 13641.7191 | 230.5098 | 98.1189 | Compound peak |
| Sum      |      |             | 13903.2481 |          |         |               |

HPLC for compound 12c

## **Biology part**

### **Culture conditions**

*L.* cultured in tissue flasks containing RPMI 1640 medium supplemented with 10% HIFCS and 100 IU penicillin and 100 µgml<sup>-1</sup> streptomycin solution at 26°C (Tariku et al., 2010; Habtemariam, 2003; Seifert et al., 2010). Stock solution and working concentration preparation All the compounds tested were dissolved in DMSO to a final concentration of 1 mg/ml Both test and standard solutions were serially diluted to appropriate concentrations using complete media. The test compounds were prepared by three-fold serial dilutions from 10 µgml<sup>-1</sup> to 0.04 µg ml<sup>-1</sup> Amphotericin B deoxycholate and miltefosine which were used as a positive control for comparison of the antileishmanial activities of the test compounds, were also made in three-fold serial dilutions (Foroumadi et al., 2005)

Tariku Y, Hymete A, Hailu A, Rohloff J (2010). Constituents, Antileishmanial Activity and Toxicity Profile of Volatile Oil from Berries of *Croton macrostachyus*. *Nat. Prod. Commun.* 5:975-980.

Habtemariam S (2003). In vitro antileishmanial effects of antibacterial diterpenes from two Ethiopian premna species: *P.schimperi* and *P. oligotricha*. *BMC pharmacol* 3:1-6.

Seifert K, Escobar P, Croft SL (2010). In vitro activity of anti-leishmanial drugs against *Leishmania donovani* is host cell dependent. *J. Antimicrob. Chemother.* 3:508-11

Foroumadi A, Pournourmohammadi S, Soltani F, Asgharian-Rezaee M, Dabiri S, Kharazmi A, Shafiee A (2005). Synthesis and in vitro leishmanicidal activity of 2-(5-nitro-2-furyl) and 2-(5-nitro-2-thienyl)-5- substituted-1, 3, 4-thiadiazoles. *Bioorg. Med. Chem. Lett.* 15:1983- 1985.

## Docking part

**Table S1.** RMSD values between the best-scoring binding mode obtained with CmDock and the best-scoring binding mode obtained with AutoDock Vina.

| AutoDock Vina<br>Compound 5 affinity to<br>Lm-PTR1 (kcal/mol) | CmDock<br>Compound 5 affinity to<br>Lm-PTR1 (kcal/mol) | RMSD (Å) |
|---------------------------------------------------------------|--------------------------------------------------------|----------|
| -8.4                                                          | -20.73                                                 | 1.69     |

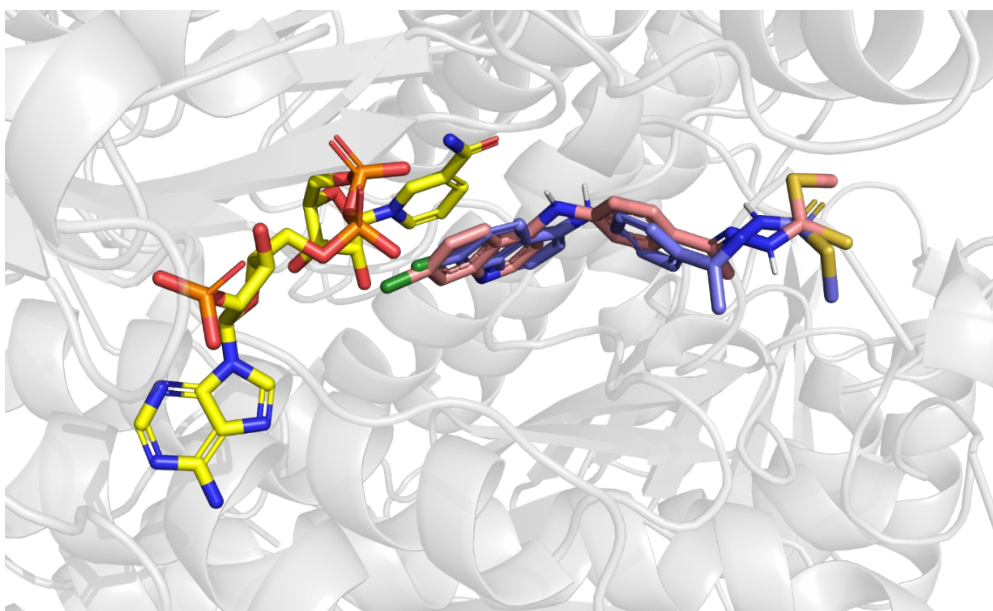

**Figure S1.** The binding mode of compound 5 obtained with CmDock (pink) in comparison with the binding mode of compound 5 obtained with AutoDock Vina (purple). The cofactor NADPH is presented in yellow.

The calculated RMSD value between the best-scoring docked poses, obtained with CmDock and AutoDock Vina equals 1.69 Å, which indicates that the binding modes obtained with both docking programs are indeed very similar. This additionally confirms the validity of the applied molecular docking protocol in CmDock.

To demonstrate the stability of the observed intermolecular interactions during 100 ns MD simulation, the occupancies of the observed intermolecular interactions in 25 ns intervals are presented in **Table S2**.

**Table S2.** Occupancy of intermolecular interactions throughout 100 ns MD simulation of compound 5-Lm-PTR1 complex.

| <b>Residue</b>   | <b>Interaction type</b> | <b>Occupancy</b> |
|------------------|-------------------------|------------------|
| <b>0-25 ns</b>   |                         |                  |
| TYR194           | H-bond                  | 100.00%          |
| PHE113           | Hydrophobic             | 97.21%           |
| HIS241           | H-bond                  | 88.45%           |
| LEU229           | Hydrophobic             | 76.10%           |
| LEU226           | Hydrophobic             | 70.60%           |
| LEU188           | Hydrophobic             | 62.67%           |
| GLY225           | Waterbridge             | 56.29%           |
| PHE113           | Pi-stack                | 50.77%           |
| <b>26-50 ns</b>  |                         |                  |
| PHE113           | Hydrophobic             | 99%              |
| TYR194           | H-bond                  | 97%              |
| LEU229           | Hydrophobic             | 77%              |
| HIS241           | H-bond                  | 74%              |
| LEU226           | Hydrophobic             | 65%              |
| LEU188           | Hydrophobic             | 63%              |
| GLY225           | H-bond                  | 52%              |
| PHE113           | Pi-stack                | 50.9%            |
| <b>51-75 ns</b>  |                         |                  |
| PHE113           | Hydrophobic             | 98%              |
| TYR194           | H-bond                  | 98%              |
| LEU229           | Hydrophobic             | 81%              |
| HIS241           | H-bond                  | 78%              |
| LEU226           | Hydrophobic             | 68%              |
| LEU188           | Hydrophobic             | 65%              |
| GLY225           | H-bond                  | 52%              |
| PHE113           | Pi-stack                | 50%              |
| <b>76-100 ns</b> |                         |                  |
| PHE113           | Hydrophobic             | 99%              |
| HIS241           | H-bond                  | 98%              |
| TYR194           | H-bond                  | 97%              |
| LEU229           | Hydrophobic             | 78%              |
| LEU188           | Hydrophobic             | 67%              |
| LEU226           | Hydrophobic             | 66%              |
| GLY225           | H-bond                  | 57%              |
| PHE113           | Pi-stack                | 54%              |
